# Supplementary material for: Development and characterization of a strawberry MAGIC population derived from crosses with six strawberry cultivars
Source: PubMed Central journal article supplement — Breed Sci. 2017 Aug 4;67(4):370–81. doi: 10.1270/jsbbs.17009 (PMC5654461; doi:10.1270/jsbbs.17009), 2017-08-04
Supplement: 67_17009_1.pdf [file 67_17009_1.pdf]

**Supplemental Table 1.** EST-SSR marker used for genotyping of F<sub>1</sub> and IC1 generation while developing strawberry MAGIC population

| Marker Name | chromosome<br>( <i>F.</i> ) | position<br>(bp) | TopHit | PCR product size (bp) |     |     |     |     | Reference                                   |                                      |
|-------------|-----------------------------|------------------|--------|-----------------------|-----|-----|-----|-----|---------------------------------------------|--------------------------------------|
| FAES0024    | Fvb7                        | 19,517,758       | TopHit | 151                   | 156 |     |     |     | Isobe et al (2013) DNA Res 20: 79-92        |                                      |
| FAES0076    | Fvb6                        | 29,364,507       |        | 212                   | 214 | 218 |     |     | Isobe et al (2013) DNA Res 20: 79-92        |                                      |
| FAES0080    | Fvb2                        | 28,218,073       | TopHit | 187                   | 194 | 196 |     |     | Isobe et al (2013) DNA Res 20: 79-92        |                                      |
| FAES0093    | Fvb4                        | 32,273,348       |        | 181                   | 187 | 193 |     |     | Isobe et al (2013) DNA Res 20: 79-92        |                                      |
| FAES0107    | Fvb7                        | 889,225          |        | 297                   | 300 | 303 |     |     | Isobe et al (2013) DNA Res 20: 79-92        |                                      |
| FAES0208    | Fvb4                        | 23,748,049       |        | 260                   | 288 |     |     |     | Isobe et al (2013) DNA Res 20: 79-92        |                                      |
| FAES0228    | Fvb6                        | 7,669,955        |        | 368                   | 371 |     |     |     | Isobe et al (2013) DNA Res 20: 79-92        |                                      |
| FAES0243    | Fvb6                        | 18,556,966       |        | 463                   | 469 |     |     |     | Isobe et al (2013) DNA Res 20: 79-92        |                                      |
| FAES0293    | Fvb2                        | 26,102,277       |        | 182                   | 184 |     |     |     | Isobe et al (2013) DNA Res 20: 79-92        |                                      |
| FAES0357    | Fvb7                        | 15,401,395       | TopHit | 473                   | 474 | 477 |     |     | Isobe et al (2013) DNA Res 20: 79-92        |                                      |
| FAES0376    | Fvb1                        | 1,123,323        | TopHit | 192                   |     |     |     |     | Isobe et al (2013) DNA Res 20: 79-92        |                                      |
| FAES0377    | Fvb7                        | 20,851,368       |        | 277                   |     |     |     |     | Isobe et al (2013) DNA Res 20: 79-92        |                                      |
| FAES0465    | Fvb2                        | 4,136,264        |        | 204                   | 206 | 211 |     |     | Isobe et al (2013) DNA Res 20: 79-92        |                                      |
| FAES0479    | Fvb1                        | 7,519,621        |        | 226                   | 232 |     |     |     | Isobe et al (2013) DNA Res 20: 79-92        |                                      |
| FAES0528    | Fvb4                        | 26,428,091       |        | 279                   |     |     |     |     | Isobe et al (2013) DNA Res 20: 79-92        |                                      |
| FATS0033    | Fvb2                        | 22,117,662       | TopHit | 236                   |     |     |     |     | Isobe et al (2013) DNA Res 20: 79-92        |                                      |
| EMFvi 133   | Fvb6                        | 28,929,740       |        | 230                   | 232 |     |     |     | Sargent et al (2003) Mol Eco Note 3:550-552 |                                      |
| RosCOS 1238 | Fvb2                        | 6,110,542        |        | 221                   | 229 |     |     |     | Cabrera (2009) BMC Genomics 10:562          |                                      |
| RosCOS 1321 | Fvb1                        | 6,238,094        |        | 445                   | 446 |     |     |     | Cabrera (2009) BMC Genomics 10:562          |                                      |
| FVES0007    | Fvb4                        | 18,340,725       | TopHit | 151                   | 171 | 188 | 195 | 198 | Isobe et al (2013) DNA Res 20: 79-92        |                                      |
| FVES0109    | Fvb1                        | 13,109,991       |        | 150                   | 152 | 157 | 158 | 159 | 172                                         | Isobe et al (2013) DNA Res 20: 79-92 |
| FVES0128    | Fvb7                        | 3,752,019        |        | 189                   | 192 | 195 |     |     |                                             | Isobe et al (2013) DNA Res 20: 79-92 |
| FVES0228    | Fvb6                        | 37,846,505       |        | 451                   | 456 | 460 |     |     |                                             | Isobe et al (2013) DNA Res 20: 79-92 |
| FVES0233    | Fvb5                        | 19,650,546       |        | 175                   | 178 |     |     |     |                                             | Isobe et al (2013) DNA Res 20: 79-92 |
| FVES0298    | Fvb3                        | 27,332,842       |        | 239                   |     |     |     |     |                                             | Isobe et al (2013) DNA Res 20: 79-92 |
| FVES0381    | Fvb7                        | 4,684,340        |        | 473                   | 475 | 477 | 479 |     |                                             | Isobe et al (2013) DNA Res 20: 79-92 |
| FVES0392    | Fvb6                        | 32,768,853       |        | 129                   | 132 |     |     |     |                                             | Isobe et al (2013) DNA Res 20: 79-92 |
| FVES0435    | Fvb7                        | 22,962,133       |        | 199                   | 202 |     |     |     |                                             | Isobe et al (2013) DNA Res 20: 79-92 |
| FVES0459    | Fvb1                        | 6,184,610        |        | 260                   | 264 |     |     |     |                                             | Isobe et al (2013) DNA Res 20: 79-92 |
| FVES0463    | Fvb6                        | 36,900,824       |        | 191                   | 200 |     |     |     |                                             | Isobe et al (2013) DNA Res 20: 79-92 |
| FVES0480    | Fvb3                        | 10,021,328       |        | 291                   | 298 |     |     |     |                                             | Isobe et al (2013) DNA Res 20: 79-92 |
| FVES0513    | Fvb6                        | 17,333,025       |        | 316                   | 320 |     |     |     |                                             | Isobe et al (2013) DNA Res 20: 79-92 |
| FVES0537    | Fvb6                        | 16,472,437       |        | 208                   | 210 | 212 | 214 |     |                                             | Isobe et al (2013) DNA Res 20: 79-92 |
| FVES0567    | Fvb4                        | 20,976,966       |        | 289                   | 292 |     |     |     |                                             | Isobe et al (2013) DNA Res 20: 79-92 |
| FVES0577    | Fvb4                        | 1,078,578        |        | 205                   | 208 |     |     |     |                                             | Isobe et al (2013) DNA Res 20: 79-92 |
| FVES0581    | Fvb3                        | 17,410,302       |        | 241                   | 244 |     |     |     |                                             | Isobe et al (2013) DNA Res 20: 79-92 |
| FVES0634    | Fvb7                        | 19,490,916       |        | 101                   | 104 |     |     |     |                                             | Isobe et al (2013) DNA Res 20: 79-92 |
| FVES0693    | Fvb4                        | 131,290          |        | 207                   | 208 |     |     |     |                                             | Isobe et al (2013) DNA Res 20: 79-92 |
| FVES0794    | Fvb5                        | 3,629,957        |        | 182                   | 187 |     |     |     |                                             | Isobe et al (2013) DNA Res 20: 79-92 |
| FVES0857    | Fvb2                        | 18,267,136       |        | 157                   |     |     |     |     |                                             | Isobe et al (2013) DNA Res 20: 79-92 |
| FVES0960    | Fvb3                        | 6,739,743        |        | 303                   | 306 | 309 |     |     |                                             | Isobe et al (2013) DNA Res 20: 79-92 |
| FVES0989    | Fvb1                        | 13,495,042       |        | 403                   | 409 |     |     |     |                                             | Isobe et al (2013) DNA Res 20: 79-92 |
| FVES0999    | Fvb4                        | 4,908,006        |        | 229                   |     |     |     |     |                                             | Isobe et al (2013) DNA Res 20: 79-92 |
| FVES1031    | Fvb4                        | 30,806,105       |        | 454                   | 458 | 462 |     |     |                                             | Isobe et al (2013) DNA Res 20: 79-92 |
| FVES1040    | Fvb2                        | 27,460,768       |        | 192                   | 198 |     |     |     |                                             | Isobe et al (2013) DNA Res 20: 79-92 |
| FVES1070    | Fvb6                        | 6,330,488        |        | 269                   | 271 |     |     |     |                                             | Isobe et al (2013) DNA Res 20: 79-92 |
| FVES1156    | Fvb3                        | 3,358,493        |        | 226                   |     |     |     |     |                                             | Isobe et al (2013) DNA Res 20: 79-92 |
| FVES1160    | Fvb2                        | 188,425          |        | 174                   | 178 |     |     |     |                                             | Isobe et al (2013) DNA Res 20: 79-92 |
| FVES1183    | Fvb5                        | 28,617,109       |        | 407                   | 413 |     |     |     |                                             | Isobe et al (2013) DNA Res 20: 79-92 |
| FVES1192    | Fvb1                        | 10,433,474       |        | 295                   | 298 |     |     |     |                                             | Isobe et al (2013) DNA Res 20: 79-92 |
| FVES1201    | Fvb1                        | 7,221,482        |        | 175                   | 177 | 180 |     |     |                                             | Isobe et al (2013) DNA Res 20: 79-92 |
| FVES1208    | Fvb6                        | 11,957,540       |        | 504                   | 511 |     |     |     |                                             | Isobe et al (2013) DNA Res 20: 79-92 |
| FVES1213    | Fvb3                        | 4,166,818        |        | 248                   | 259 |     |     |     |                                             | Isobe et al (2013) DNA Res 20: 79-92 |
| FVES1224    | Fvb3                        | 2,814,719        |        | 110                   | 123 |     |     |     |                                             | Isobe et al (2013) DNA Res 20: 79-92 |
| FVES1230    | Fvb2                        | 26,430,877       |        | 164                   | 167 | 171 |     |     |                                             | Isobe et al (2013) DNA Res 20: 79-92 |
| FVES1313    | Fvb3                        | 7,985,642        |        | 298                   | 299 |     |     |     |                                             | Isobe et al (2013) DNA Res 20: 79-92 |
| FVES1356    | Fvb4                        | 15,466,483       |        | 209                   | 211 |     |     |     |                                             | Isobe et al (2013) DNA Res 20: 79-92 |
| FVES1362    | Fvb2                        | 15,451,150       |        | 329                   | 332 |     |     |     |                                             | Isobe et al (2013) DNA Res 20: 79-92 |
| FVES1392    | Fvb5                        | 10,543,285       |        | 209                   | 210 | 213 |     |     |                                             | Isobe et al (2013) DNA Res 20: 79-92 |
| FVES1465    | Fvb4                        | 23,438,752       |        | 116                   |     |     |     |     |                                             | Isobe et al (2013) DNA Res 20: 79-92 |
| FVES1470    | Fvb5                        | 5,108,525        | TopHit | 299                   | 302 |     |     |     |                                             | Isobe et al (2013) DNA Res 20: 79-92 |
| FVES1477    | Fvb7                        | 21,595,931       |        | 282                   | 289 |     |     |     |                                             | Isobe et al (2013) DNA Res 20: 79-92 |
| FVES1501    | Fvb1                        | 15,654,878       |        | 267                   | 270 |     |     |     |                                             | Isobe et al (2013) DNA Res 20: 79-92 |
| FVES1552    | Fvb4                        | 26,080,807       |        | 221                   |     |     |     |     |                                             | Isobe et al (2013) DNA Res 20: 79-92 |
| FVES1621    | Fvb1                        | 5,938,104        |        | 214                   | 220 |     |     |     |                                             | Isobe et al (2013) DNA Res 20: 79-92 |

(continued)

| Marker Name | chromosome<br>( <i>F.</i> ) | position<br>(bp) | TopHit | PCR product size (bp) |     |     |     |  | Reference                            |
|-------------|-----------------------------|------------------|--------|-----------------------|-----|-----|-----|--|--------------------------------------|
| FVES1630    | Fvb7                        | 17,328,359       | 392    | 404                   |     |     |     |  | Isobe et al (2013) DNA Res 20: 79-92 |
| FVES1640    | Fvb6                        | 33,957,186       | 293    | 302                   |     |     |     |  | Isobe et al (2013) DNA Res 20: 79-92 |
| FVES1724    | Fvb6                        | 34,321,498       | 447    |                       |     |     |     |  | Isobe et al (2013) DNA Res 20: 79-92 |
| FVES1771    | Fvb3                        | 16,891,489       | 251    | 263                   |     |     |     |  | Isobe et al (2013) DNA Res 20: 79-92 |
| FVES1793    | Fvb3                        | 764,610          | 176    | 186                   | 190 |     |     |  | Isobe et al (2013) DNA Res 20: 79-92 |
| FVES1816    | Fvb5                        | 20,772,009       | 294    | 299                   |     |     |     |  | Isobe et al (2013) DNA Res 20: 79-92 |
| FVES1877    | Fvb1                        | 4,092,938        | 317    | 321                   |     |     |     |  | Isobe et al (2013) DNA Res 20: 79-92 |
| FVES1907    | Fvb1                        | 7,014,881        | 183    | 187                   | 197 | 202 | 204 |  | Isobe et al (2013) DNA Res 20: 79-92 |
| FVES1912    | Fvb2                        | 8,733,248        | 220    |                       |     |     |     |  | Isobe et al (2013) DNA Res 20: 79-92 |
| FVES2103    | Fvb2                        | 6,967,129        | 177    | 179                   |     |     |     |  | Isobe et al (2013) DNA Res 20: 79-92 |
| FVES2230    | Fvb2                        | 466,508          | 176    | 179                   | 180 | 183 |     |  | Isobe et al (2013) DNA Res 20: 79-92 |
| FVES2235    | Fvb4                        | 29,895,233       | TopHit | 320                   | 322 |     |     |  | Isobe et al (2013) DNA Res 20: 79-92 |
| FVES2260    | Fvb3                        | 13,325,858       | 442    |                       |     |     |     |  | Isobe et al (2013) DNA Res 20: 79-92 |
| FVES2277    | Fvb2                        | 1,979,847        | 277    | 279                   |     |     |     |  | Isobe et al (2013) DNA Res 20: 79-92 |
| FVES2281    | Fvb4                        | 22,392,247       | 173    | 175                   |     |     |     |  | Isobe et al (2013) DNA Res 20: 79-92 |
| FVES2289    | Fvb4                        | 28,093,280       | 276    | 282                   |     |     |     |  | Isobe et al (2013) DNA Res 20: 79-92 |
| FVES2316    | Fvb6                        | 16,869,389       | 217    | 221                   |     |     |     |  | Isobe et al (2013) DNA Res 20: 79-92 |
| FVES2349    | Fvb5                        | 28,903,163       | 295    | 307                   |     |     |     |  | Isobe et al (2013) DNA Res 20: 79-92 |
| FVES2369    | Fvb6                        | 12,584,411       | 277    | 280                   |     |     |     |  | Isobe et al (2013) DNA Res 20: 79-92 |
| FVES2387    | Fvb3                        | 31,399,157       | 176    | 179                   |     |     |     |  | Isobe et al (2013) DNA Res 20: 79-92 |
| FVES2533    | Fvb6                        | 25,337,378       | 231    | 236                   |     |     |     |  | Isobe et al (2013) DNA Res 20: 79-92 |
| FVES2619    | Fvb2                        | 1,948,639        | 281    | 290                   |     |     |     |  | Isobe et al (2013) DNA Res 20: 79-92 |
| FVES2661    | Fvb2                        | 28,017,151       | 287    | 340                   |     |     |     |  | Isobe et al (2013) DNA Res 20: 79-92 |
| FVES2778    | Fvb6                        | 11,515,167       | 409    | 421                   |     |     |     |  | Isobe et al (2013) DNA Res 20: 79-92 |
| FVES2868    | Fvb3                        | 18,504,406       | 261    | 263                   |     |     |     |  | Isobe et al (2013) DNA Res 20: 79-92 |
| FVES2882    | Fvb4                        | 14,411,361       | 254    | 266                   |     |     |     |  | Isobe et al (2013) DNA Res 20: 79-92 |
| FVES2901    | Fvb5                        | 19,192,042       | 163    | 166                   |     |     |     |  | Isobe et al (2013) DNA Res 20: 79-92 |
| FVES2950    | Fvb1                        | 17,037,047       | 236    | 242                   |     |     |     |  | Isobe et al (2013) DNA Res 20: 79-92 |
| FVES2999    | Fvb3                        | 15,110,397       | 288    | 291                   |     |     |     |  | Isobe et al (2013) DNA Res 20: 79-92 |
| FVES3039    | Fvb4                        | 31,491,167       | 257    |                       |     |     |     |  | Isobe et al (2013) DNA Res 20: 79-92 |
| FVES3081    | Fvb5                        | 722,868          | 299    | 321                   |     |     |     |  | Isobe et al (2013) DNA Res 20: 79-92 |
| FVES3100    | Fvb1                        | 3,105,465        | 220    | 223                   |     |     |     |  | Isobe et al (2013) DNA Res 20: 79-92 |
| FVES3274    | Fvb5                        | 3,549,108        | 351    | 354                   |     |     |     |  | Isobe et al (2013) DNA Res 20: 79-92 |
| FVES3330    | Fvb1                        | 406,630          | 188    | 194                   |     |     |     |  | Isobe et al (2013) DNA Res 20: 79-92 |
| FVES3346    | Fvb6                        | 15,169,371       | 326    | 327                   |     |     |     |  | Isobe et al (2013) DNA Res 20: 79-92 |
| FVES3434    | Fvb5                        | 9,083,213        | 206    | 212                   |     |     |     |  | Isobe et al (2013) DNA Res 20: 79-92 |
| FVES3440    | Fvb6                        | 16,927,676       | 240    | 244                   |     |     |     |  | Isobe et al (2013) DNA Res 20: 79-92 |
| FVES3594    | Fvb4                        | 29,895,233       | TopHit | 539                   | 540 | 542 |     |  | Isobe et al (2013) DNA Res 20: 79-92 |
| FVES3693    | Fvb5                        | 12,362,334       | 140    | 141                   |     |     |     |  | Isobe et al (2013) DNA Res 20: 79-92 |
| FVES3770    | Fvb5                        | 4,461,300        | 276    | 289                   |     |     |     |  | Isobe et al (2013) DNA Res 20: 79-92 |

**Supplemental Table 2.** EST-SSR marker used for genotyping of IC2 generation of the strawberry MAGIC population

| Marker Name | chromosome<br>( <i>F. vesca</i> v2.0a1) | position<br>(bp) | TopHit | PCR product size (bp) |     |     |     |     |     |     |     | Reference                            |
|-------------|-----------------------------------------|------------------|--------|-----------------------|-----|-----|-----|-----|-----|-----|-----|--------------------------------------|
| FAES0011    | Fvb2                                    | 22,276,743       | TopHit | 191                   | 196 | 198 | 207 | 209 | 211 | 213 | 218 | Isobe et al (2013) DNA Res 20: 79-92 |
| FAES0013    | Fvb3                                    | 29,753,208       | TopHit | 156                   | 157 | 159 | 173 |     |     |     |     | Isobe et al (2013) DNA Res 20: 79-92 |
| FAES0024    | Fvb7                                    | 19,517,758       | TopHit | 151                   | 156 |     |     |     |     |     |     | Isobe et al (2013) DNA Res 20: 79-92 |
| FAES0026    | Fvb3                                    | 16,007,822       |        | 125                   | 128 |     |     |     |     |     |     | Isobe et al (2013) DNA Res 20: 79-92 |
| FAES0027    | Fvb5                                    | 23,534,388       | TopHit | 119                   | 121 | 127 | 135 | 136 | 141 | 150 |     | Isobe et al (2013) DNA Res 20: 79-92 |
| FAES0032    | Fvb3                                    | 24,255,518       |        | 324                   |     |     |     |     |     |     |     | Isobe et al (2013) DNA Res 20: 79-92 |
| FAES0041    | Fvb1                                    | 6,803,104        |        | 172                   | 174 | 175 |     |     |     |     |     | Isobe et al (2013) DNA Res 20: 79-92 |
| FAES0043    | Fvb4                                    | 25,299,377       |        | 155                   | 157 | 159 | 181 |     |     |     |     | Isobe et al (2013) DNA Res 20: 79-92 |
| FAES0049    | Fvb7                                    | 10,496,442       |        | 171                   | 176 | 180 | 191 |     |     |     |     | Isobe et al (2013) DNA Res 20: 79-92 |
| FAES0062    | Fvb3                                    | 63,475           |        | 176                   | 178 | 183 | 185 | 191 |     |     |     | Isobe et al (2013) DNA Res 20: 79-92 |
| FAES0065    | Fvb2                                    | 27,976,239       |        | 318                   | 321 |     |     |     |     |     |     | Isobe et al (2013) DNA Res 20: 79-92 |
| FAES0066    | Fvb3                                    | 7,601,395        |        | 295                   | 301 | 308 |     |     |     |     |     | Isobe et al (2013) DNA Res 20: 79-92 |
| FAES0067    | Fvb7                                    | 21,517,321       | TopHit | 139                   | 142 | 145 |     |     |     |     |     | Isobe et al (2013) DNA Res 20: 79-92 |
| FAES0068    | Fvb5                                    | 271,418          | TopHit | 180                   | 188 | 201 | 209 |     |     |     |     | Isobe et al (2013) DNA Res 20: 79-92 |
| FAES0070    | Fvb6                                    | 30,363,434       |        | 288                   | 294 | 297 | 300 | 306 | 309 | 312 |     | Isobe et al (2013) DNA Res 20: 79-92 |
| FAES0071    | Fvb1                                    | 9,418,971        |        | 120                   | 123 | 124 | 135 | 143 |     |     |     | Isobe et al (2013) DNA Res 20: 79-92 |
| FAES0080    | Fvb2                                    | 28,218,073       | TopHit | 188                   | 194 | 196 |     |     |     |     |     | Isobe et al (2013) DNA Res 20: 79-92 |
| FAES0083    | Fvb6                                    | 16,024,132       | TopHit | 109                   | 112 | 114 |     |     |     |     |     | Isobe et al (2013) DNA Res 20: 79-92 |
| FAES0085    | Fvb6                                    | 31,832,832       | TopHit | 216                   | 240 | 242 |     |     |     |     |     | Isobe et al (2013) DNA Res 20: 79-92 |
| FAES0092    | Fvb2                                    | 19,384,103       |        | 248                   | 251 |     |     |     |     |     |     | Isobe et al (2013) DNA Res 20: 79-92 |
| FAES0093    | Fvb4                                    | 32,273,348       |        | 181                   | 187 | 193 |     |     |     |     |     | Isobe et al (2013) DNA Res 20: 79-92 |
| FAES0094    | Fvb5                                    | 522,988          |        | 123                   | 126 | 127 |     |     |     |     |     | Isobe et al (2013) DNA Res 20: 79-92 |
| FAES0097    | Fvb7                                    | 16,510,165       |        | 284                   | 287 | 290 |     |     |     |     |     | Isobe et al (2013) DNA Res 20: 79-92 |
| FAES0099    | Fvb1                                    | 23,188,929       |        | 233                   | 237 | 243 | 246 |     |     |     |     | Isobe et al (2013) DNA Res 20: 79-92 |
| FAES0100    | Fvb3                                    | 13,394,422       | TopHit | 214                   | 217 |     |     |     |     |     |     | Isobe et al (2013) DNA Res 20: 79-92 |
| FAES0101    | Fvb2                                    | 7,473,870        | TopHit | 270                   | 273 | 275 |     |     |     |     |     | Isobe et al (2013) DNA Res 20: 79-92 |
| FAES0104    | Fvb2                                    | 9,259,780        | TopHit | 279                   | 282 |     |     |     |     |     |     | Isobe et al (2013) DNA Res 20: 79-92 |
| FAES0105    | Fvb4                                    | 26,668,802       |        | 137                   | 141 | 147 | 150 | 249 |     |     |     | Isobe et al (2013) DNA Res 20: 79-92 |
| FAES0107    | Fvb7                                    | 889,225          |        | 298                   | 301 |     |     |     |     |     |     | Isobe et al (2013) DNA Res 20: 79-92 |
| FAES0114    | Fvb5                                    | 375,848          |        | 141                   | 150 | 159 |     |     |     |     |     | Isobe et al (2013) DNA Res 20: 79-92 |
| FAES0115    | Fvb5                                    | 1,795,770        | TopHit | 311                   | 313 | 318 |     |     |     |     |     | Isobe et al (2013) DNA Res 20: 79-92 |
| FAES0128    | Fvb3                                    | 26,322,060       |        | 298                   | 316 |     |     |     |     |     |     | Isobe et al (2013) DNA Res 20: 79-92 |
| FAES0131    | Fvb7                                    | 13,964,206       | TopHit | 255                   | 261 | 264 |     |     |     |     |     | Isobe et al (2013) DNA Res 20: 79-92 |
| FAES0136    | Fvb2                                    | 28,802,589       |        | 325                   | 328 |     |     |     |     |     |     | Isobe et al (2013) DNA Res 20: 79-92 |
| FAES0137    | Fvb6                                    | 4,932,405        |        | 154                   |     |     |     |     |     |     |     | Isobe et al (2013) DNA Res 20: 79-92 |
| FAES0152    | Fvb2                                    | 24,994,497       | TopHit | 271                   | 273 |     |     |     |     |     |     | Isobe et al (2013) DNA Res 20: 79-92 |
| FAES0156    | Fvb7                                    | 21,688,453       | TopHit | 162                   | 173 | 188 |     |     |     |     |     | Isobe et al (2013) DNA Res 20: 79-92 |
| FAES0161    | Fvb3                                    | 5,096,337        |        | 168                   |     |     |     |     |     |     |     | Isobe et al (2013) DNA Res 20: 79-92 |
| FAES0164    | Fvb3                                    | 4,337,206        | TopHit | 171                   | 176 |     |     |     |     |     |     | Isobe et al (2013) DNA Res 20: 79-92 |
| FAES0168    | Fvb6                                    | 36,518,576       | TopHit | 268                   | 271 |     |     |     |     |     |     | Isobe et al (2013) DNA Res 20: 79-92 |
| FAES0180    | Fvb5                                    | 1,960,692        | TopHit | 263                   |     |     |     |     |     |     |     | Isobe et al (2013) DNA Res 20: 79-92 |
| FAES0184    | Fvb2                                    | 26,993,186       |        | 133                   | 146 |     |     |     |     |     |     | Isobe et al (2013) DNA Res 20: 79-92 |
| FAES0186    | Fvb3                                    | 3,615,737        |        | 325                   | 332 |     |     |     |     |     |     | Isobe et al (2013) DNA Res 20: 79-92 |
| FAES0192    | Fvb4                                    | 29,273,932       |        | 167                   |     |     |     |     |     |     |     | Isobe et al (2013) DNA Res 20: 79-92 |
| FAES0202    | Fvb2                                    | 9,105,336        |        | 178                   | 187 |     |     |     |     |     |     | Isobe et al (2013) DNA Res 20: 79-92 |
| FAES0205    | Fvb7                                    | 20,954,406       |        | 165                   | 183 |     |     |     |     |     |     | Isobe et al (2013) DNA Res 20: 79-92 |
| FAES0208    | Fvb4                                    | 23,748,049       |        | 260                   | 288 |     |     |     |     |     |     | Isobe et al (2013) DNA Res 20: 79-92 |
| FAES0209    | Fvb4                                    | 12,649,549       | TopHit | 123                   | 153 |     |     |     |     |     |     | Isobe et al (2013) DNA Res 20: 79-92 |
| FAES0226    | Fvb2                                    | 24,011,512       |        | 124                   | 142 |     |     |     |     |     |     | Isobe et al (2013) DNA Res 20: 79-92 |
| FAES0233    | Fvb6                                    | 28,619,917       |        | 108                   | 110 |     |     |     |     |     |     | Isobe et al (2013) DNA Res 20: 79-92 |
| FAES0236    | Fvb7                                    | 790,147          | TopHit | 132                   | 149 | 154 |     |     |     |     |     | Isobe et al (2013) DNA Res 20: 79-92 |
| FAES0243    | Fvb6                                    | 18,556,966       |        | 461                   | 467 |     |     |     |     |     |     | Isobe et al (2013) DNA Res 20: 79-92 |
| FAES0245    | Fvb1                                    | 12,428,491       |        | 290                   | 294 | 301 |     |     |     |     |     | Isobe et al (2013) DNA Res 20: 79-92 |
| FAES0251    | Fvb7                                    | 19,751,151       |        | 146                   | 152 | 174 |     |     |     |     |     | Isobe et al (2013) DNA Res 20: 79-92 |
| FAES0255    | Fvb7                                    | 8,055,366        |        | 380                   | 382 |     |     |     |     |     |     | Isobe et al (2013) DNA Res 20: 79-92 |
| FAES0265    | Fvb6                                    | 19,755,105       |        | 373                   | 377 |     |     |     |     |     |     | Isobe et al (2013) DNA Res 20: 79-92 |
| FAES0273    | Fvb2                                    | 23,919,178       |        | 338                   | 353 | 356 |     |     |     |     |     | Isobe et al (2013) DNA Res 20: 79-92 |
| FAES0287    | Fvb4                                    | 15,435,396       |        | 163                   | 211 |     |     |     |     |     |     | Isobe et al (2013) DNA Res 20: 79-92 |
| FAES0289    | Fvb6                                    | 6,851,194        | TopHit | 259                   |     |     |     |     |     |     |     | Isobe et al (2013) DNA Res 20: 79-92 |
| FAES0293    | Fvb2                                    | 26,102,277       |        | 182                   | 184 |     |     |     |     |     |     | Isobe et al (2013) DNA Res 20: 79-92 |

(continued)

| Marker Name | chromosome<br>( <i>F. vesca</i> v2.0a1) | position<br>(bp) | TopHit | PCR product size (bp) |     |     |     | Reference                            |
|-------------|-----------------------------------------|------------------|--------|-----------------------|-----|-----|-----|--------------------------------------|
| FAES0295    | Fvb7                                    | 21,186,963       | TopHit | 412                   | 486 |     |     | Isobe et al (2013) DNA Res 20: 79-92 |
| FAES0296    | Fvb4                                    | 14,549,040       | TopHit | 189                   | 195 | 200 |     | Isobe et al (2013) DNA Res 20: 79-92 |
| FAES0298    | Fvb3                                    | 29,587,017       |        | 272                   | 276 |     |     | Isobe et al (2013) DNA Res 20: 79-92 |
| FAES0301    | Fvb5                                    | 2,546,586        |        | 165                   | 173 |     |     | Isobe et al (2013) DNA Res 20: 79-92 |
| FAES0327    | Fvb7                                    | 23,397,949       |        | 212                   | 224 |     |     | Isobe et al (2013) DNA Res 20: 79-92 |
| FAES0332    | Fvb6                                    | 29,363,400       |        | 232                   | 235 | 237 | 245 | Isobe et al (2013) DNA Res 20: 79-92 |
| FAES0333    | Fvb5                                    | 11,056,419       |        | 284                   | 290 |     |     | Isobe et al (2013) DNA Res 20: 79-92 |
| FAES0336    | FvbUn                                   | 1,914,995        |        | 214                   |     |     |     | Isobe et al (2013) DNA Res 20: 79-92 |
| FAES0340    | Fvb2                                    | 24,571,296       | TopHit | 205                   | 207 | 210 |     | Isobe et al (2013) DNA Res 20: 79-92 |
| FAES0343    | Fvb7                                    | 18,133,785       |        | 201                   | 206 | 213 |     | Isobe et al (2013) DNA Res 20: 79-92 |
| FAES0346    | Fvb5                                    | 12,707,003       |        | 246                   |     |     |     | Isobe et al (2013) DNA Res 20: 79-92 |
| FAES0352    | Fvb1                                    | 4,308,151        |        | 380                   | 396 | 405 | 418 | Isobe et al (2013) DNA Res 20: 79-92 |
| FAES0354    | Fvb2                                    | 27,446,007       |        | 211                   | 216 | 220 |     | Isobe et al (2013) DNA Res 20: 79-92 |
| FAES0357    | Fvb7                                    | 15,401,395       | TopHit | 475                   | 476 |     |     | Isobe et al (2013) DNA Res 20: 79-92 |
| FAES0363    | Fvb7                                    | 889,122          | TopHit | 242                   | 244 | 250 | 252 | Isobe et al (2013) DNA Res 20: 79-92 |
| FAES0376    | Fvb1                                    | 1,123,323        | TopHit | 193                   |     |     |     | Isobe et al (2013) DNA Res 20: 79-92 |
| FAES0378    | Fvb1                                    | 6,640,395        |        | 160                   | 163 | 166 |     | Isobe et al (2013) DNA Res 20: 79-92 |
| FAES0379    | Fvb4                                    | 28,427,679       | TopHit | 195                   |     |     |     | Isobe et al (2013) DNA Res 20: 79-92 |
| FAES0394    | Fvb7                                    | 18,172,035       | TopHit | 218                   | 220 |     |     | Isobe et al (2013) DNA Res 20: 79-92 |
| FAES0407    | Fvb6                                    | 19,899,549       | TopHit | 307                   | 311 |     |     | Isobe et al (2013) DNA Res 20: 79-92 |
| FAES0440    | Fvb5                                    | 13,053,454       |        | 293                   | 301 |     |     | Isobe et al (2013) DNA Res 20: 79-92 |
| FAES0445    | Fvb2                                    | 26,190,713       |        | 316                   | 318 |     |     | Isobe et al (2013) DNA Res 20: 79-92 |
| FAES0450    | Fvb3                                    | 5,370,822        |        | 235                   | 237 | 241 |     | Isobe et al (2013) DNA Res 20: 79-92 |
| FAES0454    | Fvb1                                    | 3,524,669        |        | 405                   | 413 | 415 |     | Isobe et al (2013) DNA Res 20: 79-92 |
| FAES0462    | Fvb6                                    | 22,286,040       | TopHit | 266                   | 276 |     |     | Isobe et al (2013) DNA Res 20: 79-92 |
| FAES0473    | Fvb6                                    | 3,596,541        |        | 195                   | 236 |     |     | Isobe et al (2013) DNA Res 20: 79-92 |
| FAES0475    | Fvb5                                    | 1,063,708        | TopHit | 255                   | 260 |     |     | Isobe et al (2013) DNA Res 20: 79-92 |
| FAES0479    | Fvb1                                    | 7,519,621        |        | 224                   | 226 | 229 |     | Isobe et al (2013) DNA Res 20: 79-92 |
| FAES0499    | Fvb6                                    | 4,518,293        | TopHit | 283                   | 286 | 288 |     | Isobe et al (2013) DNA Res 20: 79-92 |
| FAES0504    | Fvb3                                    | 25,663,788       |        | 389                   | 400 |     |     | Isobe et al (2013) DNA Res 20: 79-92 |
| FAES0521    | Fvb6                                    | 9,530,882        |        | 496                   | 501 |     |     | Isobe et al (2013) DNA Res 20: 79-92 |
| FAES0527    | Fvb3                                    | 32,525,352       |        | 208                   | 211 |     |     | Isobe et al (2013) DNA Res 20: 79-92 |
| FAES0532    | Fvb5                                    | 6,505,479        |        | 257                   | 260 | 265 | 273 | 280                                  |
| FAES0558    | Fvb2                                    | 17,365,224       | TopHit | 413                   | 416 | 419 | 434 | Isobe et al (2013) DNA Res 20: 79-92 |
| FAES0560    | Fvb6                                    | 13,369,292       | TopHit | 163                   | 169 | 256 | 267 | Isobe et al (2013) DNA Res 20: 79-92 |
| FAES0564    | Fvb1                                    | 10,781,579       | TopHit | 256                   | 267 |     |     | Isobe et al (2013) DNA Res 20: 79-92 |
| FAES0567    | Fvb4                                    | 23,233,018       |        | 246                   |     |     |     | Isobe et al (2013) DNA Res 20: 79-92 |
| FAES0578    | Fvb3                                    | 2,791,634        | TopHit | 284                   | 287 | 292 | 319 | Isobe et al (2013) DNA Res 20: 79-92 |
| FAES0580    | Fvb7                                    | 2,265,983        | TopHit | 122                   |     |     |     | Isobe et al (2013) DNA Res 20: 79-92 |
| FAES0582    | Fvb4                                    | 4,694,285        | TopHit | 270                   | 273 | 277 | 279 | 295                                  |
| FAES0587    | Fvb3                                    | 9,852,957        |        | 217                   | 223 |     |     | Isobe et al (2013) DNA Res 20: 79-92 |
| FAES0594    | Fvb6                                    | 23,206,118       | TopHit | 249                   | 252 |     |     | Isobe et al (2013) DNA Res 20: 79-92 |
| FAES0605    | Fvb6                                    | 23,771,948       |        | 258                   | 264 |     |     | Isobe et al (2013) DNA Res 20: 79-92 |
| RosCOS 1371 | Fvb6                                    | 8,330,263        | TopHit | 445                   | 446 |     |     | Cabrera (2009) BMC Genomics 10:562   |
| FVES0007    | Fvb4                                    | 251,918          | TopHit | 148                   | 168 | 185 | 192 | 195                                  |
| FVES0008    | Fvb3                                    | 29,377,951       |        | 281                   | 293 | 299 |     | Isobe et al (2013) DNA Res 20: 79-92 |
| FVES0011    | Fvb3                                    | 5,116,343        |        | 214                   | 225 | 227 | 229 | Isobe et al (2013) DNA Res 20: 79-92 |
| FVES0019    | Fvb5                                    | 22,731,501       |        | 153                   | 177 | 189 | 201 | Isobe et al (2013) DNA Res 20: 79-92 |
| FVES0027    | Fvb7                                    | 7,343,495        | TopHit | 235                   | 269 |     |     | Isobe et al (2013) DNA Res 20: 79-92 |
| FVES0030    | Fvb1                                    | 6,672,217        | TopHit | 120                   | 138 |     |     | Isobe et al (2013) DNA Res 20: 79-92 |
| FVES0032    | Fvb2                                    | 19,754,756       |        | 177                   | 188 |     |     | Isobe et al (2013) DNA Res 20: 79-92 |
| FVES0034    | Fvb4                                    | 26,257,590       |        | 216                   | 221 |     |     | Isobe et al (2013) DNA Res 20: 79-92 |
| FVES0035    | Fvb6                                    | 11,952,292       |        | 289                   | 295 | 305 |     | Isobe et al (2013) DNA Res 20: 79-92 |
| FVES0044    | Fvb2                                    | 14,340,587       |        | 194                   | 223 |     |     | Isobe et al (2013) DNA Res 20: 79-92 |
| FVES0045    | Fvb5                                    | 26,291,574       | TopHit | 259                   | 260 | 262 | 265 | 266                                  |
| FVES0048    | Fvb1                                    | 12,569,971       |        | 191                   | 201 | 212 |     | Isobe et al (2013) DNA Res 20: 79-92 |
| FVES0055    | Fvb4                                    | 15,762,756       | TopHit | 244                   | 246 |     |     | Isobe et al (2013) DNA Res 20: 79-92 |
| FVES0061    | Fvb1                                    | 22,660,824       |        | 155                   | 159 |     |     | Isobe et al (2013) DNA Res 20: 79-92 |
| FVES0070    | Fvb3                                    | 29,158,849       | TopHit | 213                   | 229 | 240 |     | Isobe et al (2013) DNA Res 20: 79-92 |
| FVES0072    | Fvb4                                    | 15,301,359       |        | 171                   | 175 | 178 | 181 | Isobe et al (2013) DNA Res 20: 79-92 |

(continued)

| Marker Name | chromosome<br>( <i>F. vesca</i> v2.0a1) | position<br>(bp) | TopHit | PCR product size (bp) |     |     |     |     |     |     |     | Reference                            |
|-------------|-----------------------------------------|------------------|--------|-----------------------|-----|-----|-----|-----|-----|-----|-----|--------------------------------------|
| FVES0076    | Fvb4                                    | 23,434,333       |        | 241                   | 244 | 247 | 250 | 253 | 256 | 259 | 262 | Isobe et al (2013) DNA Res 20: 79-92 |
| FVES0078    | Fvb7                                    | 1,800,816        |        | 128                   | 152 | 158 |     |     |     |     |     | Isobe et al (2013) DNA Res 20: 79-92 |
| FVES0080    | Fvb2                                    | 51,418           |        | 249                   | 280 | 307 |     |     |     |     |     | Isobe et al (2013) DNA Res 20: 79-92 |
| FVES0087    | Fvb2                                    | 3,723,772        |        | 199                   |     |     |     |     |     |     |     | Isobe et al (2013) DNA Res 20: 79-92 |
| FVES0088    | Fvb7                                    | 19,755,131       |        | 190                   | 209 |     |     |     |     |     |     | Isobe et al (2013) DNA Res 20: 79-92 |
| FVES0097    | Fvb3                                    | 9,992,063        | TopHit | 279                   | 283 |     |     |     |     |     |     | Isobe et al (2013) DNA Res 20: 79-92 |
| FVES0100    | Fvb2                                    | 27,403,065       |        | 202                   | 203 | 207 |     |     |     |     |     | Isobe et al (2013) DNA Res 20: 79-92 |
| FVES0109    | Fvb1                                    | 13,109,991       |        | 154                   | 155 | 158 | 159 | 172 |     |     |     | Isobe et al (2013) DNA Res 20: 79-92 |
| FVES0112    | Fvb7                                    | 9,278,040        | TopHit | 222                   | 228 |     |     |     |     |     |     | Isobe et al (2013) DNA Res 20: 79-92 |
| FVES0114    | Fvb4                                    | 16,663,754       |        | 173                   | 175 |     |     |     |     |     |     | Isobe et al (2013) DNA Res 20: 79-92 |
| FVES0118    | Fvb6                                    | 37,868,323       | TopHit | 248                   | 250 |     |     |     |     |     |     | Isobe et al (2013) DNA Res 20: 79-92 |
| FVES0119    | Fvb6                                    | 19,939,188       |        | 243                   | 245 | 249 |     |     |     |     |     | Isobe et al (2013) DNA Res 20: 79-92 |
| FVES0123    | Fvb4                                    | 29,745,325       |        | 297                   | 299 |     |     |     |     |     |     | Isobe et al (2013) DNA Res 20: 79-92 |
| FVES0125    | Fvb7                                    | 14,572,987       |        | 283                   | 286 | 292 | 298 |     |     |     |     | Isobe et al (2013) DNA Res 20: 79-92 |
| FVES0129    | Fvb2                                    | 15,092,494       |        | 299                   | 302 |     |     |     |     |     |     | Isobe et al (2013) DNA Res 20: 79-92 |
| FVES0130    | Fvb4                                    | 24,772,842       |        | 266                   | 274 |     |     |     |     |     |     | Isobe et al (2013) DNA Res 20: 79-92 |
| FVES0132    | Fvb4                                    | 7,481,620        | TopHit | 115                   | 210 | 235 |     |     |     |     |     | Isobe et al (2013) DNA Res 20: 79-92 |
| FVES0133    | Fvb6                                    | 1,719,735        |        | 288                   | 292 | 294 |     |     |     |     |     | Isobe et al (2013) DNA Res 20: 79-92 |
| FVES0138    | Fvb4                                    | 12,327,785       |        | 258                   | 263 |     |     |     |     |     |     | Isobe et al (2013) DNA Res 20: 79-92 |
| FVES0139    | Fvb1                                    | 23,020,409       |        | 238                   | 241 |     |     |     |     |     |     | Isobe et al (2013) DNA Res 20: 79-92 |
| FVES0147    | Fvb2                                    | 22,927,617       |        | 167                   | 180 | 183 |     |     |     |     |     | Isobe et al (2013) DNA Res 20: 79-92 |
| FVES0158    | Fvb7                                    | 16,884,139       |        | 300                   | 306 |     |     |     |     |     |     | Isobe et al (2013) DNA Res 20: 79-92 |
| FVES0163    | Fvb1                                    | 13,884,692       |        | 257                   | 260 |     |     |     |     |     |     | Isobe et al (2013) DNA Res 20: 79-92 |
| FVES0166    | Fvb2                                    | 21,863,980       |        | 245                   | 249 | 251 |     |     |     |     |     | Isobe et al (2013) DNA Res 20: 79-92 |
| FVES0168    | Fvb2                                    | 12,193,980       |        | 128                   | 136 | 143 | 158 | 162 | 164 |     |     | Isobe et al (2013) DNA Res 20: 79-92 |
| FVES0171    | Fvb7                                    | 21,603,284       |        | 265                   | 269 |     |     |     |     |     |     | Isobe et al (2013) DNA Res 20: 79-92 |
| FVES0174    | Fvb2                                    | 12,789,251       |        | 299                   | 314 |     |     |     |     |     |     | Isobe et al (2013) DNA Res 20: 79-92 |
| FVES0175    | Fvb1                                    | 1,715,798        |        | 208                   | 210 | 212 |     |     |     |     |     | Isobe et al (2013) DNA Res 20: 79-92 |
| FVES0181    | Fvb3                                    | 293,550          |        | 217                   | 221 | 224 | 225 |     |     |     |     | Isobe et al (2013) DNA Res 20: 79-92 |
| FVES0190    | Fvb7                                    | 16,041,767       |        | 224                   | 227 | 230 | 232 | 236 |     |     |     | Isobe et al (2013) DNA Res 20: 79-92 |
| FVES0191    | Fvb6                                    | 38,623,475       |        | 216                   | 228 | 231 | 251 |     |     |     |     | Isobe et al (2013) DNA Res 20: 79-92 |
| FVES0192    | Fvb7                                    | 13,812,819       | TopHit | 151                   | 168 | 170 | 175 | 176 | 181 | 183 |     | Isobe et al (2013) DNA Res 20: 79-92 |
| FVES0195    | Fvb6                                    | 20,871,726       |        | 288                   | 291 | 297 | 300 |     |     |     |     | Isobe et al (2013) DNA Res 20: 79-92 |
| FVES0213    | Fvb4                                    | 1,023,261        | TopHit | 298                   | 301 | 307 |     |     |     |     |     | Isobe et al (2013) DNA Res 20: 79-92 |
| FVES0214    | Fvb2                                    | 22,327,188       |        | 226                   | 235 |     |     |     |     |     |     | Isobe et al (2013) DNA Res 20: 79-92 |
| FVES0222    | Fvb3                                    | 589,517          |        | 205                   | 225 |     |     |     |     |     |     | Isobe et al (2013) DNA Res 20: 79-92 |
| FVES0224    | Fvb2                                    | 28,855,582       |        | 146                   | 156 | 161 | 163 |     |     |     |     | Isobe et al (2013) DNA Res 20: 79-92 |
| FVES0228    | Fvb6                                    | 37,846,505       |        | 451                   | 456 |     |     |     |     |     |     | Isobe et al (2013) DNA Res 20: 79-92 |
| FVES0233    | Fvb5                                    | 19,650,546       |        | 175                   | 178 |     |     |     |     |     |     | Isobe et al (2013) DNA Res 20: 79-92 |
| FVES0237    | Fvb3                                    | 2,240,393        |        | 329                   | 337 | 339 | 346 | 349 |     |     |     | Isobe et al (2013) DNA Res 20: 79-92 |
| FVES0242    | Fvb4                                    | 571,428          | TopHit | 160                   | 167 | 169 | 171 | 188 | 190 |     |     | Isobe et al (2013) DNA Res 20: 79-92 |
| FVES0244    | Fvb4                                    | 26,095,003       |        | 216                   | 222 | 225 |     |     |     |     |     | Isobe et al (2013) DNA Res 20: 79-92 |
| FVES0260    | Fvb1                                    | 16,858,882       |        | 182                   |     |     |     |     |     |     |     | Isobe et al (2013) DNA Res 20: 79-92 |
| FVES0261    | Fvb2                                    | 564,830          |        | 296                   | 298 | 300 | 301 |     |     |     |     | Isobe et al (2013) DNA Res 20: 79-92 |
| FVES0277    | Fvb3                                    | 24,481,175       |        | 113                   | 118 | 205 | 206 |     |     |     |     | Isobe et al (2013) DNA Res 20: 79-92 |
| FVES0289    | Fvb1                                    | 4,206,758        |        | 182                   | 187 | 196 | 205 |     |     |     |     | Isobe et al (2013) DNA Res 20: 79-92 |
| FVES0290    | Fvb4                                    | 30,449,754       |        | 276                   | 279 | 284 |     |     |     |     |     | Isobe et al (2013) DNA Res 20: 79-92 |
| FVES0301    | Fvb6                                    | 630,482          |        | 296                   | 313 |     |     |     |     |     |     | Isobe et al (2013) DNA Res 20: 79-92 |
| FVES0302    | Fvb5                                    | 9,159,156        |        | 273                   | 276 | 282 |     |     |     |     |     | Isobe et al (2013) DNA Res 20: 79-92 |
| FVES0311    | Fvb5                                    | 7,793,193        |        | 271                   | 274 |     |     |     |     |     |     | Isobe et al (2013) DNA Res 20: 79-92 |
| FVES0315    | Fvb4                                    | 23,317,896       | TopHit | 210                   | 220 | 226 |     |     |     |     |     | Isobe et al (2013) DNA Res 20: 79-92 |
| FVES0318    | Fvb4                                    | 7,116,184        |        | 254                   | 257 | 263 |     |     |     |     |     | Isobe et al (2013) DNA Res 20: 79-92 |
| FVES0319    | Fvb5                                    | 25,271,872       |        | 224                   | 227 |     |     |     |     |     |     | Isobe et al (2013) DNA Res 20: 79-92 |
| FVES0320    | Fvb2                                    | 26,959,720       |        | 283                   | 286 |     |     |     |     |     |     | Isobe et al (2013) DNA Res 20: 79-92 |
| FVES0322    | Fvb6                                    | 13,106,608       |        | 217                   |     |     |     |     |     |     |     | Isobe et al (2013) DNA Res 20: 79-92 |
| FVES0326    | Fvb1                                    | 17,036,320       |        | 191                   | 194 | 197 |     |     |     |     |     | Isobe et al (2013) DNA Res 20: 79-92 |
| FVES0328    | Fvb4                                    | 31,242,545       |        | 262                   | 265 |     |     |     |     |     |     | Isobe et al (2013) DNA Res 20: 79-92 |
| FVES0329    | Fvb4                                    | 32,393,189       |        | 257                   | 259 |     |     |     |     |     |     | Isobe et al (2013) DNA Res 20: 79-92 |
| FVES0331    | Fvb3                                    | 3,390,359        |        | 286                   | 292 | 301 |     |     |     |     |     | Isobe et al (2013) DNA Res 20: 79-92 |
| FVES0332    | Fvb6                                    | 15,712,898       |        | 199                   | 202 | 205 | 208 |     |     |     |     | Isobe et al (2013) DNA Res 20: 79-92 |

(continued)

| Marker Name | chromosome<br>( <i>F. vesca</i> v2.0a1) | position<br>(bp) | TopHit | PCR product size (bp) |     |     |     |     | Reference                            |                                      |
|-------------|-----------------------------------------|------------------|--------|-----------------------|-----|-----|-----|-----|--------------------------------------|--------------------------------------|
| FVES0340    | Fvb1                                    | 555,215          |        | 223                   | 229 |     |     |     | Isobe et al (2013) DNA Res 20: 79-92 |                                      |
| FVES0341    | Fvb6                                    | 38,201,874       |        | 309                   | 312 |     |     |     | Isobe et al (2013) DNA Res 20: 79-92 |                                      |
| FVES0343    | Fvb3                                    | 20,922,816       |        | 186                   | 192 |     |     |     | Isobe et al (2013) DNA Res 20: 79-92 |                                      |
| FVES0347    | Fvb2                                    | 12,191,423       |        | 206                   | 401 |     |     |     | Isobe et al (2013) DNA Res 20: 79-92 |                                      |
| FVES0352    | Fvb6                                    | 6,458,815        |        | 277                   | 286 |     |     |     | Isobe et al (2013) DNA Res 20: 79-92 |                                      |
| FVES0359    | Fvb3                                    | 32,202,364       |        | 280                   | 283 | 286 |     |     | Isobe et al (2013) DNA Res 20: 79-92 |                                      |
| FVES0365    | Fvb3                                    | 1,232,939        |        | 290                   | 293 | 298 |     |     | Isobe et al (2013) DNA Res 20: 79-92 |                                      |
| FVES0373    | Fvb4                                    | 28,138,540       |        | 106                   | 109 |     |     |     | Isobe et al (2013) DNA Res 20: 79-92 |                                      |
| FVES0376    | Fvb1                                    | 1,387,954        |        | 245                   | 251 | 256 | 258 | 261 | Isobe et al (2013) DNA Res 20: 79-92 |                                      |
| FVES0380    | Fvb2                                    | 10,089,447       |        | 305                   | 308 |     |     |     | Isobe et al (2013) DNA Res 20: 79-92 |                                      |
| FVES0381    | Fvb7                                    | 4,684,340        |        | 475                   | 477 | 481 |     |     | Isobe et al (2013) DNA Res 20: 79-92 |                                      |
| FVES0384    | Fvb5                                    | 6,730            |        | 173                   | 176 |     |     |     | Isobe et al (2013) DNA Res 20: 79-92 |                                      |
| FVES0391    | Fvb3                                    | 31,860,783       |        | 236                   | 242 | 245 | 248 |     | Isobe et al (2013) DNA Res 20: 79-92 |                                      |
| FVES0392    | Fvb6                                    | 32,768,853       |        | 125                   | 128 | 131 |     |     | Isobe et al (2013) DNA Res 20: 79-92 |                                      |
| FVES0396    | Fvb7                                    | 23,589,316       |        | 155                   | 159 |     |     |     | Isobe et al (2013) DNA Res 20: 79-92 |                                      |
| FVES0397    | Fvb6                                    | 37,598,658       |        | 272                   | 301 |     |     |     | Isobe et al (2013) DNA Res 20: 79-92 |                                      |
| FVES0398    | Fvb5                                    | 23,050,867       |        | 227                   | 233 | 323 |     |     | Isobe et al (2013) DNA Res 20: 79-92 |                                      |
| FVES0401    | Fvb2                                    | 1,335,857        |        | 173                   | 185 | 188 |     |     | Isobe et al (2013) DNA Res 20: 79-92 |                                      |
| FVES0402    | Fvb7                                    | 6,188,019        |        | 257                   | 268 | 277 | 283 |     | Isobe et al (2013) DNA Res 20: 79-92 |                                      |
| FVES0411    | Fvb5                                    | 389,081          |        | 354                   | 361 |     |     |     | Isobe et al (2013) DNA Res 20: 79-92 |                                      |
| FVES0416    | Fvb1                                    | 17,853,719       |        | 156                   | 158 | 161 |     |     | Isobe et al (2013) DNA Res 20: 79-92 |                                      |
| FVES0419    | Fvb5                                    | 5,222,932        |        | 113                   | 116 |     |     |     | Isobe et al (2013) DNA Res 20: 79-92 |                                      |
| FVES0431    | Fvb1                                    | 5,248,624        |        | 280                   |     |     |     |     | Isobe et al (2013) DNA Res 20: 79-92 |                                      |
| FVES0432    | Fvb4                                    | 32,273,381       |        | 262                   | 268 | 270 | 274 |     | Isobe et al (2013) DNA Res 20: 79-92 |                                      |
| FVES0434    | Fvb7                                    | 18,645,266       |        | 200                   | 225 | 231 |     |     | Isobe et al (2013) DNA Res 20: 79-92 |                                      |
| FVES0435    | Fvb7                                    | 22,962,133       |        | 197                   | 200 |     |     |     | Isobe et al (2013) DNA Res 20: 79-92 |                                      |
| FVES0437    | Fvb5                                    | 7,009,186        |        | 266                   | 275 |     |     |     | Isobe et al (2013) DNA Res 20: 79-92 |                                      |
| FVES0439    | Fvb4                                    | 6,630,068        |        | 386                   | 388 |     |     |     | Isobe et al (2013) DNA Res 20: 79-92 |                                      |
| FVES0443    | Fvb5                                    | 26,904,853       |        | 271                   | 276 |     |     |     | Isobe et al (2013) DNA Res 20: 79-92 |                                      |
| FVES0447    | Fvb6                                    | 31,150,390       |        | 247                   | 253 | 256 | 259 |     | Isobe et al (2013) DNA Res 20: 79-92 |                                      |
| FVES0451    | Fvb6                                    | 35,929,313       | TopHit | 120                   | 126 |     |     |     | Isobe et al (2013) DNA Res 20: 79-92 |                                      |
| FVES0455    | Fvb2                                    | 25,161,774       |        | 144                   | 146 | 154 |     |     | Isobe et al (2013) DNA Res 20: 79-92 |                                      |
| FVES0456    | Fvb3                                    | 10,597,202       |        | 244                   | 262 | 265 | 267 | 270 | Isobe et al (2013) DNA Res 20: 79-92 |                                      |
| FVES0458    | Fvb3                                    | 5,921,700        |        | 123                   | 125 |     |     |     | Isobe et al (2013) DNA Res 20: 79-92 |                                      |
| FVES0459    | Fvb1                                    | 6,184,610        |        | 258                   | 262 |     |     |     | Isobe et al (2013) DNA Res 20: 79-92 |                                      |
| FVES0461    | Fvb1                                    | 13,227,155       |        | 284                   | 287 | 291 | 294 | 296 | Isobe et al (2013) DNA Res 20: 79-92 |                                      |
| FVES0463    | Fvb6                                    | 36,900,824       |        | 193                   | 202 |     |     |     | Isobe et al (2013) DNA Res 20: 79-92 |                                      |
| FVES0464    | Fvb7                                    | 12,944,011       |        | 168                   | 175 | 187 |     |     | Isobe et al (2013) DNA Res 20: 79-92 |                                      |
| FVES0468    | Fvb1                                    | 8,722,993        |        | 245                   | 248 |     |     |     | Isobe et al (2013) DNA Res 20: 79-92 |                                      |
| FVES0472    | Fvb2                                    | 23,385,399       |        | 306                   | 316 |     |     |     | Isobe et al (2013) DNA Res 20: 79-92 |                                      |
| FVES0475    | Fvb7                                    | 15,206,850       |        | 171                   | 177 | 180 | 183 |     | Isobe et al (2013) DNA Res 20: 79-92 |                                      |
| FVES0478    | Fvb4                                    | 26,361,054       |        | 305                   | 310 | 313 | 322 | 334 | Isobe et al (2013) DNA Res 20: 79-92 |                                      |
| FVES0479    | Fvb5                                    | 5,369,517        |        | 215                   | 220 | 224 | 229 | 249 | Isobe et al (2013) DNA Res 20: 79-92 |                                      |
| FVES0480    | Fvb3                                    | 10,021,328       |        | 303                   | 304 | 307 |     |     | Isobe et al (2013) DNA Res 20: 79-92 |                                      |
| FVES0495    | Fvb4                                    | 15,804,662       |        | 287                   | 294 | 299 |     |     | Isobe et al (2013) DNA Res 20: 79-92 |                                      |
| FVES0497    | Fvb1                                    | 17,893,326       |        | 396                   | 399 |     |     |     | Isobe et al (2013) DNA Res 20: 79-92 |                                      |
| FVES0499    | Fvb6                                    | 6,712,818        |        | 272                   |     |     |     |     | Isobe et al (2013) DNA Res 20: 79-92 |                                      |
| FVES0504    | Fvb6                                    | 25,954,698       | TopHit | 185                   | 187 | 190 |     |     | Isobe et al (2013) DNA Res 20: 79-92 |                                      |
| FVES0506    | Fvb6                                    | 11,699,028       |        | 184                   | 187 |     |     |     | Isobe et al (2013) DNA Res 20: 79-92 |                                      |
| FVES0507    | Fvb5                                    | 7,494,104        |        | 183                   | 192 |     |     |     | Isobe et al (2013) DNA Res 20: 79-92 |                                      |
| FVES0513    | Fvb6                                    | 17,333,025       |        | 316                   | 319 |     |     |     | Isobe et al (2013) DNA Res 20: 79-92 |                                      |
| FVES0519    | Fvb1                                    | 8,024,013        |        | 171                   | 176 |     |     |     | Isobe et al (2013) DNA Res 20: 79-92 |                                      |
| FVES0531    | Fvb5                                    | 5,944,051        |        | 299                   | 301 | 302 |     |     | Isobe et al (2013) DNA Res 20: 79-92 |                                      |
| FVES0538    | Fvb6                                    | 35,663,327       |        | 300                   | 307 | 309 |     |     | Isobe et al (2013) DNA Res 20: 79-92 |                                      |
| FVES0540    | Fvb4                                    | 31,766,535       |        | 193                   | 208 | 211 |     |     | Isobe et al (2013) DNA Res 20: 79-92 |                                      |
| FVES0545    | Fvb5                                    | 1,443,469        | TopHit | 227                   | 230 | 234 |     |     | Isobe et al (2013) DNA Res 20: 79-92 |                                      |
| FVES0546    | Fvb7                                    | 13,964,206       |        | 188                   | 194 | 197 |     |     | Isobe et al (2013) DNA Res 20: 79-92 |                                      |
| FVES0553    | Fvb6                                    | 8,732,606        |        | 518                   | 525 |     |     |     | Isobe et al (2013) DNA Res 20: 79-92 |                                      |
| FVES0554    | Fvb6                                    | 24,462,904       |        | 91                    | 112 | 121 | 127 | 130 | 133                                  | Isobe et al (2013) DNA Res 20: 79-92 |
| FVES0555    | Fvb3                                    | 4,335,494        |        | 291                   | 294 | 299 | 303 |     | Isobe et al (2013) DNA Res 20: 79-92 |                                      |

(continued)

| Marker Name | chromosome<br>( <i>F. vesca</i> v2.0a1) | position<br>(bp) | TopHit | PCR product size (bp) |     |     |             | Reference                            |
|-------------|-----------------------------------------|------------------|--------|-----------------------|-----|-----|-------------|--------------------------------------|
| FVES0567    | Fvb4                                    | 20,976,966       |        | 291                   | 294 |     |             | Isobe et al (2013) DNA Res 20: 79-92 |
| FVES0577    | Fvb4                                    | 1,078,578        |        | 206                   | 209 | 203 | 206         | Isobe et al (2013) DNA Res 20: 79-92 |
| FVES0580    | Fvb3                                    | 702,443          |        | 388                   | 394 |     |             | Isobe et al (2013) DNA Res 20: 79-92 |
| FVES0582    | Fvb5                                    | 11,504,337       |        | 115                   | 121 |     |             | Isobe et al (2013) DNA Res 20: 79-92 |
| FVES0585    | Fvb4                                    | 25,634,066       |        | 395                   | 399 | 401 |             | Isobe et al (2013) DNA Res 20: 79-92 |
| FVES0586    | Fvb2                                    | 129,735          | TopHit | 209                   | 211 | 215 |             | Isobe et al (2013) DNA Res 20: 79-92 |
| FVES0589    | Fvb7                                    | 8,994,102        |        | 129                   | 132 |     |             | Isobe et al (2013) DNA Res 20: 79-92 |
| FVES0601    | Fvb4                                    | 22,014,030       |        | 308                   |     |     |             | Isobe et al (2013) DNA Res 20: 79-92 |
| FVES0602    | Fvb2                                    | 15,644,090       |        | 239                   | 241 | 244 | 247         | Isobe et al (2013) DNA Res 20: 79-92 |
| FVES0603    | Fvb6                                    | 12,540,813       |        | 169                   |     |     |             | Isobe et al (2013) DNA Res 20: 79-92 |
| FVES0605    | Fvb4                                    | 30,047,627       |        | 229                   | 231 | 234 | 236         | Isobe et al (2013) DNA Res 20: 79-92 |
| FVES0622    | Fvb5                                    | 21,037,603       |        | 91                    | 102 | 131 |             | Isobe et al (2013) DNA Res 20: 79-92 |
| FVES0634    | Fvb7                                    | 19,490,916       |        | 101                   | 104 |     |             | Isobe et al (2013) DNA Res 20: 79-92 |
| FVES0640    | Fvb7                                    | 11,441,996       |        | 204                   | 207 |     |             | Isobe et al (2013) DNA Res 20: 79-92 |
| FVES0644    | Fvb4                                    | 19,285,196       |        | 569                   | 575 | 581 |             | Isobe et al (2013) DNA Res 20: 79-92 |
| FVES0646    | Fvb2                                    | 11,389,849       |        | 178                   | 186 | 196 | 204         | Isobe et al (2013) DNA Res 20: 79-92 |
| FVES0648    | Fvb5                                    | 2,346,990        |        | 112                   | 115 |     |             | Isobe et al (2013) DNA Res 20: 79-92 |
| FVES0650    | Fvb7                                    | 3,723,854        |        | 318                   | 321 |     |             | Isobe et al (2013) DNA Res 20: 79-92 |
| FVES0658    | Fvb6                                    | 23,207,231       |        | 158                   | 167 | 176 |             | Isobe et al (2013) DNA Res 20: 79-92 |
| FVES0659    | Fvb5                                    | 13,239,913       |        | 128                   | 131 |     |             | Isobe et al (2013) DNA Res 20: 79-92 |
| FVES0661    | Fvb2                                    | 27,307,421       |        | 201                   | 207 | 213 |             | Isobe et al (2013) DNA Res 20: 79-92 |
| FVES0662    | Fvb1                                    | 2,192,647        |        | 531                   | 537 | 546 | 565         | Isobe et al (2013) DNA Res 20: 79-92 |
| FVES0663    | Fvb5                                    | 1,845,512        |        | 181                   | 187 |     |             | Isobe et al (2013) DNA Res 20: 79-92 |
| FVES0667    | Fvb1                                    | 16,861,987       |        | 302                   |     |     |             | Isobe et al (2013) DNA Res 20: 79-92 |
| FVES0670    | Fvb1                                    | 8,044,326        |        | 332                   | 342 | 344 | 348         | Isobe et al (2013) DNA Res 20: 79-92 |
| FVES0684    | Fvb6                                    | 9,350,993        |        | 271                   | 274 |     |             | Isobe et al (2013) DNA Res 20: 79-92 |
| FVES0686    | Fvb6                                    | 1,628,834        |        | 200                   | 203 |     |             | Isobe et al (2013) DNA Res 20: 79-92 |
| FVES0690    | Fvb7                                    | 2,867,149        | TopHit | 149                   | 153 | 155 |             | Isobe et al (2013) DNA Res 20: 79-92 |
| FVES0692    | Fvb4                                    | 29,273,899       |        | 203                   | 215 |     |             | Isobe et al (2013) DNA Res 20: 79-92 |
| FVES0694    | Fvb1                                    | 4,838,976        |        | 299                   | 300 |     |             | Isobe et al (2013) DNA Res 20: 79-92 |
| FVES0716    | Fvb4                                    | 27,667,981       |        | 138                   | 141 |     |             | Isobe et al (2013) DNA Res 20: 79-92 |
| FVES0720    | Fvb4                                    | 5,959,746        |        | 241                   | 254 | 257 |             | Isobe et al (2013) DNA Res 20: 79-92 |
| FVES0723    | Fvb4                                    | 14,029,280       |        | 179                   | 190 |     |             | Isobe et al (2013) DNA Res 20: 79-92 |
| FVES0730    | Fvb1                                    | 7,644,048        |        | 267                   | 269 | 278 |             | Isobe et al (2013) DNA Res 20: 79-92 |
| FVES0738    | Fvb2                                    | 16,410,436       |        | 155                   | 174 | 186 | 218         | Isobe et al (2013) DNA Res 20: 79-92 |
| FVES0741    | Fvb2                                    | 15,159,972       |        | 132                   | 136 |     |             | Isobe et al (2013) DNA Res 20: 79-92 |
| FVES0743    | Fvb4                                    | 19,798,288       |        | 227                   | 229 | 232 | 234 240 242 | Isobe et al (2013) DNA Res 20: 79-92 |
| FVES0767    | Fvb2                                    | 27,441,876       |        | 147                   | 149 |     |             | Isobe et al (2013) DNA Res 20: 79-92 |
| FVES0769    | Fvb5                                    | 12,923,070       |        | 265                   | 274 |     |             | Isobe et al (2013) DNA Res 20: 79-92 |
| FVES0771    | Fvb1                                    | 9,907,509        |        | 273                   | 279 | 281 | 289         | Isobe et al (2013) DNA Res 20: 79-92 |
| FVES0772    | Fvb6                                    | 9,577,261        |        | 52                    |     |     |             | Isobe et al (2013) DNA Res 20: 79-92 |
| FVES0785    | Fvb4                                    | 21,241,970       |        | 315                   | 318 |     |             | Isobe et al (2013) DNA Res 20: 79-92 |
| FVES0794    | Fvb5                                    | 3,629,957        |        | 182                   | 187 |     |             | Isobe et al (2013) DNA Res 20: 79-92 |
| FVES0795    | Fvb1                                    | 11,813,204       |        | 236                   | 238 |     |             | Isobe et al (2013) DNA Res 20: 79-92 |
| FVES0797    | Fvb1                                    | 15,406,649       | TopHit | 184                   | 194 | 202 | 206 212     | Isobe et al (2013) DNA Res 20: 79-92 |
| FVES0803    | Fvb6                                    | 25,699,680       |        | 247                   |     |     |             | Isobe et al (2013) DNA Res 20: 79-92 |
| FVES0809    | Fvb3                                    | 9,096,740        |        | 357                   | 360 |     |             | Isobe et al (2013) DNA Res 20: 79-92 |
| FVES0810    | Fvb1                                    | 2,788,189        |        | 360                   | 365 |     |             | Isobe et al (2013) DNA Res 20: 79-92 |
| FVES0814    | Fvb7                                    | 843,935          |        | 196                   | 198 | 201 |             | Isobe et al (2013) DNA Res 20: 79-92 |
| FVES0818    | Fvb5                                    | 4,805,556        |        | 212                   | 218 |     |             | Isobe et al (2013) DNA Res 20: 79-92 |
| FVES0819    | Fvb4                                    | 30,914,114       | TopHit | 191                   | 193 |     |             | Isobe et al (2013) DNA Res 20: 79-92 |
| FVES0825    | Fvb6                                    | 30,634,542       | TopHit | 199                   | 206 |     |             | Isobe et al (2013) DNA Res 20: 79-92 |
| FVES0827    | Fvb6                                    | 9,161,094        |        | 179                   | 200 | 202 |             | Isobe et al (2013) DNA Res 20: 79-92 |
| FVES0845    | Fvb5                                    | 566,414          |        | 100                   | 116 |     |             | Isobe et al (2013) DNA Res 20: 79-92 |
| FVES0849    | Fvb1                                    | 7,210,231        |        | 301                   | 308 | 310 | 313         | Isobe et al (2013) DNA Res 20: 79-92 |
| FVES0859    | Fvb5                                    | 4,739,626        |        | 317                   | 320 |     |             | Isobe et al (2013) DNA Res 20: 79-92 |
| FVES0862    | Fvb2                                    | 1,853,984        |        | 160                   | 163 |     |             | Isobe et al (2013) DNA Res 20: 79-92 |
| FVES0864    | Fvb2                                    | 2,236,247        |        | 275                   | 287 | 289 |             | Isobe et al (2013) DNA Res 20: 79-92 |
| FVES0865    | Fvb1                                    | 3,410,166        |        | 267                   | 275 | 278 | 338 346 350 | Isobe et al (2013) DNA Res 20: 79-92 |
| FVES0892    | Fvb3                                    | 28,902,769       |        | 255                   | 260 | 267 |             | Isobe et al (2013) DNA Res 20: 79-92 |

(continued)

| Marker Name | chromosome<br>( <i>F. vesca</i> v2.0a1) | position<br>(bp) | TopHit | PCR product size (bp) |     |     |     | Reference                            |
|-------------|-----------------------------------------|------------------|--------|-----------------------|-----|-----|-----|--------------------------------------|
| FVES0897    | Fvb5                                    | 800,402          |        | 245                   | 251 | 263 | 269 | Isobe et al (2013) DNA Res 20: 79-92 |
| FVES0912    | Fvb1                                    | 73,952           |        | 365                   | 368 |     |     | Isobe et al (2013) DNA Res 20: 79-92 |
| FVES0913    | Fvb2                                    | 20,934,421       |        | 309                   | 318 |     |     | Isobe et al (2013) DNA Res 20: 79-92 |
| FVES0915    | Fvb1                                    | 2,306,030        |        | 243                   | 245 |     |     | Isobe et al (2013) DNA Res 20: 79-92 |
| FVES0916    | Fvb3                                    | 25,485,334       |        | 188                   | 193 |     |     | Isobe et al (2013) DNA Res 20: 79-92 |
| FVES0920    | Fvb4                                    | 30,662,613       |        | 315                   | 317 |     |     | Isobe et al (2013) DNA Res 20: 79-92 |
| FVES0923    | Fvb6                                    | 11,228,296       |        | 262                   | 263 | 266 |     | Isobe et al (2013) DNA Res 20: 79-92 |
| FVES0937    | Fvb6                                    | 4,262,955        |        | 294                   | 295 | 306 |     | Isobe et al (2013) DNA Res 20: 79-92 |
| FVES0950    | Fvb5                                    | 566,324          |        | 236                   |     |     |     | Isobe et al (2013) DNA Res 20: 79-92 |
| FVES0954    | Fvb6                                    | 29,139,719       |        | 279                   | 282 | 286 |     | Isobe et al (2013) DNA Res 20: 79-92 |
| FVES0958    | Fvb6                                    | 1,956,496        |        | 299                   | 303 |     |     | Isobe et al (2013) DNA Res 20: 79-92 |
| FVES0960    | Fvb3                                    | 6,739,743        |        | 308                   | 311 |     |     | Isobe et al (2013) DNA Res 20: 79-92 |
| FVES0962    | Fvb1                                    | 2,348,969        |        | 156                   | 158 |     |     | Isobe et al (2013) DNA Res 20: 79-92 |
| FVES0974    | Fvb6                                    | 3,079,491        |        | 272                   | 275 | 287 |     | Isobe et al (2013) DNA Res 20: 79-92 |
| FVES0987    | Fvb6                                    | 8,679,423        |        | 185                   | 191 |     |     | Isobe et al (2013) DNA Res 20: 79-92 |
| FVES0989    | Fvb1                                    | 13,495,042       |        | 402                   | 408 |     |     | Isobe et al (2013) DNA Res 20: 79-92 |
| FVES0994    | Fvb4                                    | 15,320,467       |        | 416                   | 421 | 424 |     | Isobe et al (2013) DNA Res 20: 79-92 |
| FVES1003    | Fvb4                                    | 22,656,689       |        | 276                   | 297 |     |     | Isobe et al (2013) DNA Res 20: 79-92 |
| FVES1005    | Fvb3                                    | 2,260,331        |        | 255                   | 264 |     |     | Isobe et al (2013) DNA Res 20: 79-92 |
| FVES1007    | Fvb6                                    | 17,463,229       |        | 236                   |     |     |     | Isobe et al (2013) DNA Res 20: 79-92 |
| FVES1020    | Fvb4                                    | 18,845,080       | TopHit | 168                   | 174 | 177 |     | Isobe et al (2013) DNA Res 20: 79-92 |
| FVES1022    | Fvb6                                    | 6,010,226        |        | 271                   | 277 | 280 |     | Isobe et al (2013) DNA Res 20: 79-92 |
| FVES1031    | Fvb4                                    | 30,806,105       |        | 453                   |     |     |     | Isobe et al (2013) DNA Res 20: 79-92 |
| FVES1043    | Fvb6                                    | 36,979,420       |        | 241                   | 246 | 249 |     | Isobe et al (2013) DNA Res 20: 79-92 |
| FVES1054    | Fvb1                                    | 5,695,131        |        | 301                   | 304 | 313 |     | Isobe et al (2013) DNA Res 20: 79-92 |
| FVES1058    | Fvb3                                    | 29,967,555       | TopHit | 266                   | 275 | 278 |     | Isobe et al (2013) DNA Res 20: 79-92 |
| FVES1070    | Fvb6                                    | 6,330,488        |        | 269                   | 271 |     |     | Isobe et al (2013) DNA Res 20: 79-92 |
| FVES1079    | Fvb2                                    | 23,266,143       |        | 225                   | 233 | 248 |     | Isobe et al (2013) DNA Res 20: 79-92 |
| FVES1081    | Fvb6                                    | 37,859,535       |        | 243                   | 246 |     |     | Isobe et al (2013) DNA Res 20: 79-92 |
| FVES1103    | Fvb1                                    | 209,148          |        | 250                   | 260 |     |     | Isobe et al (2013) DNA Res 20: 79-92 |
| FVES1104    | Fvb5                                    | 20,332,006       |        | 291                   | 313 |     |     | Isobe et al (2013) DNA Res 20: 79-92 |
| FVES1110    | Fvb7                                    | 6,407,738        |        | 165                   | 168 | 171 |     | Isobe et al (2013) DNA Res 20: 79-92 |
| FVES1125    | Fvb6                                    | 38,603,961       |        | 286                   | 289 |     |     | Isobe et al (2013) DNA Res 20: 79-92 |
| FVES1127    | Fvb7                                    | 14,091,080       |        | 180                   |     |     |     | Isobe et al (2013) DNA Res 20: 79-92 |
| FVES1131    | Fvb6                                    | 4,004,103        |        | 297                   | 300 |     |     | Isobe et al (2013) DNA Res 20: 79-92 |
| FVES1143    | Fvb6                                    | 38,768,693       |        | 218                   | 221 |     |     | Isobe et al (2013) DNA Res 20: 79-92 |
| FVES1149    | Fvb7                                    | 19,917,459       |        | 292                   | 307 |     |     | Isobe et al (2013) DNA Res 20: 79-92 |
| FVES1156    | Fvb3                                    | 3,358,493        |        | 228                   |     |     |     | Isobe et al (2013) DNA Res 20: 79-92 |
| FVES1163    | Fvb6                                    | 1,957,182        |        | 190                   | 199 | 202 |     | Isobe et al (2013) DNA Res 20: 79-92 |
| FVES1171    | Fvb3                                    | 20,137,346       |        | 212                   | 222 | 224 |     | Isobe et al (2013) DNA Res 20: 79-92 |
| FVES1187    | Fvb1                                    | 557,530          |        | 293                   | 298 |     |     | Isobe et al (2013) DNA Res 20: 79-92 |
| FVES1190    | Fvb3                                    | 30,520,788       |        | 281                   | 284 |     |     | Isobe et al (2013) DNA Res 20: 79-92 |
| FVES1194    | Fvb2                                    | 24,963,958       |        | 200                   | 203 |     |     | Isobe et al (2013) DNA Res 20: 79-92 |
| FVES1196    | Fvb7                                    | 1,073,462        |        | 270                   | 279 | 282 | 288 | Isobe et al (2013) DNA Res 20: 79-92 |
| FVES1201    | Fvb1                                    | 7,221,482        |        | 176                   | 179 | 182 |     | Isobe et al (2013) DNA Res 20: 79-92 |
| FVES1209    | Fvb3                                    | 2,278,293        |        | 275                   | 281 |     |     | Isobe et al (2013) DNA Res 20: 79-92 |
| FVES1213    | Fvb3                                    | 4,166,818        |        | 246                   | 258 |     |     | Isobe et al (2013) DNA Res 20: 79-92 |
| FVES1221    | Fvb7                                    | 19,242,313       |        | 246                   | 257 |     |     | Isobe et al (2013) DNA Res 20: 79-92 |
| FVES1224    | Fvb3                                    | 2,814,719        |        | 113                   | 126 |     |     | Isobe et al (2013) DNA Res 20: 79-92 |
| FVES1225    | Fvb6                                    | 24,437,687       |        | 369                   | 372 | 375 |     | Isobe et al (2013) DNA Res 20: 79-92 |
| FVES1230    | Fvb2                                    | 26,430,877       |        | 164                   | 167 | 170 |     | Isobe et al (2013) DNA Res 20: 79-92 |
| FVES1231    | Fvb1                                    | 11,749,757       |        | 328                   | 338 |     |     | Isobe et al (2013) DNA Res 20: 79-92 |
| FVES1237    | Fvb7                                    | 18,300,397       |        | 278                   | 287 | 290 |     | Isobe et al (2013) DNA Res 20: 79-92 |
| FVES1238    | Fvb3                                    | 17,599,309       | TopHit | 277                   | 289 |     |     | Isobe et al (2013) DNA Res 20: 79-92 |
| FVES1242    | Fvb6                                    | 25,122,950       |        | 166                   | 168 | 176 |     | Isobe et al (2013) DNA Res 20: 79-92 |
| FVES1249    | Fvb5                                    | 25,096,594       | TopHit | 163                   | 176 |     |     | Isobe et al (2013) DNA Res 20: 79-92 |
| FVES1250    | Fvb1                                    | 16,862,223       |        | 171                   | 180 |     |     | Isobe et al (2013) DNA Res 20: 79-92 |
| FVES1258    | Fvb2                                    | 26,431,602       |        | 261                   | 264 |     |     | Isobe et al (2013) DNA Res 20: 79-92 |
| FVES1269    | Fvb5                                    | 24,186,032       |        | 167                   | 170 | 173 |     | Isobe et al (2013) DNA Res 20: 79-92 |
| FVES1271    | Fvb6                                    | 35,586,123       |        | 265                   | 268 | 277 | 280 | Isobe et al (2013) DNA Res 20: 79-92 |



(continued)

| Marker Name | chromosome<br>( <i>F. vesca</i> v2.0a1) | position<br>(bp) | TopHit | PCR product size (bp) |     |     |         | Reference                            |
|-------------|-----------------------------------------|------------------|--------|-----------------------|-----|-----|---------|--------------------------------------|
| FVES1274    | Fvb6                                    | 2,236,319        | 423    | 425                   | 430 |     |         | Isobe et al (2013) DNA Res 20: 79-92 |
| FVES1275    | Fvb7                                    | 19,047,706       | 314    | 319                   | 322 |     |         | Isobe et al (2013) DNA Res 20: 79-92 |
| FVES1276    | Fvb3                                    | 19,045,134       | 245    | 285                   | 291 |     |         | Isobe et al (2013) DNA Res 20: 79-92 |
| FVES1277    | Fvb5                                    | 29,038,085       | 243    | 266                   |     |     |         | Isobe et al (2013) DNA Res 20: 79-92 |
| FVES1286    | Fvb1                                    | 2,568,177        | 313    | 319                   |     |     |         | Isobe et al (2013) DNA Res 20: 79-92 |
| FVES1296    | Fvb3                                    | 5,271,043        | 270    | 279                   | 293 | 304 |         | Isobe et al (2013) DNA Res 20: 79-92 |
| FVES1298    | Fvb6                                    | 27,088,444       | 131    | 137                   | 141 | 144 | 147     | Isobe et al (2013) DNA Res 20: 79-92 |
| FVES1301    | Fvb4                                    | 17,299,664       | 155    | 161                   | 182 |     |         | Isobe et al (2013) DNA Res 20: 79-92 |
| FVES1307    | Fvb3                                    | 4,168,750        | 170    | 205                   | 211 | 217 | 220 226 | Isobe et al (2013) DNA Res 20: 79-92 |
| FVES1324    | Fvb1                                    | 15,205,316       | 245    | 247                   |     |     |         | Isobe et al (2013) DNA Res 20: 79-92 |
| FVES1346    | Fvb4                                    | 15,343,557       | 169    | 172                   |     |     |         | Isobe et al (2013) DNA Res 20: 79-92 |
| FVES1354    | Fvb3                                    | 32,525,409       | 318    | 321                   |     |     |         | Isobe et al (2013) DNA Res 20: 79-92 |
| FVES1356    | Fvb4                                    | 15,466,483       | 208    | 211                   |     |     |         | Isobe et al (2013) DNA Res 20: 79-92 |
| FVES1358    | Fvb3                                    | 21,482,439       | 298    | 304                   |     |     |         | Isobe et al (2013) DNA Res 20: 79-92 |
| FVES1360    | Fvb4                                    | 23,304,625       | 315    | 320                   |     |     |         | Isobe et al (2013) DNA Res 20: 79-92 |
| FVES1362    | Fvb2                                    | 15,451,150       | 331    | 334                   |     |     |         | Isobe et al (2013) DNA Res 20: 79-92 |
| FVES1368    | Fvb7                                    | 5,694,661        | 183    | 189                   |     |     |         | Isobe et al (2013) DNA Res 20: 79-92 |
| FVES1379    | Fvb6                                    | 4,180,666        | 415    | 424                   |     |     |         | Isobe et al (2013) DNA Res 20: 79-92 |
| FVES1383    | Fvb7                                    | 6,805,925        | 141    | 173                   |     |     |         | Isobe et al (2013) DNA Res 20: 79-92 |
| FVES1390    | Fvb4                                    | 29,087,188       | 287    | 290                   | 292 |     |         | Isobe et al (2013) DNA Res 20: 79-92 |
| FVES1392    | Fvb5                                    | 10,543,285       | 210    | 213                   |     |     |         | Isobe et al (2013) DNA Res 20: 79-92 |
| FVES1396    | Fvb6                                    | 20,638,151       | 269    | 272                   | 274 |     |         | Isobe et al (2013) DNA Res 20: 79-92 |
| FVES1402    | Fvb2                                    | 24,944,542       | 146    | 150                   |     |     |         | Isobe et al (2013) DNA Res 20: 79-92 |
| FVES1403    | Fvb5                                    | 7,390,890        | 218    | 225                   | 231 | 240 |         | Isobe et al (2013) DNA Res 20: 79-92 |
| FVES1405    | Fvb4                                    | 31,281,247       | 288    | 291                   |     |     |         | Isobe et al (2013) DNA Res 20: 79-92 |
| FVES1410    | Fvb3                                    | 20,955,747       | 168    | 170                   | 172 | 177 |         | Isobe et al (2013) DNA Res 20: 79-92 |
| FVES1411    | Fvb6                                    | 142,547          | 160    | 186                   | 287 |     |         | Isobe et al (2013) DNA Res 20: 79-92 |
| FVES1417    | Fvb7                                    | 18,349,090       | 298    | 314                   |     |     |         | Isobe et al (2013) DNA Res 20: 79-92 |
| FVES1421    | Fvb2                                    | 27,741,748       | 294    | 302                   |     |     |         | Isobe et al (2013) DNA Res 20: 79-92 |
| FVES1422    | Fvb7                                    | 23,518,542       | 185    | 192                   | 201 |     |         | Isobe et al (2013) DNA Res 20: 79-92 |
| FVES1432    | Fvb7                                    | 3,847,804        | 257    | 260                   |     |     |         | Isobe et al (2013) DNA Res 20: 79-92 |
| FVES1439    | Fvb4                                    | 27,884,267       | 194    | 201                   |     |     |         | Isobe et al (2013) DNA Res 20: 79-92 |
| FVES1440    | Fvb5                                    | 19,904,401       | TopHit | 217                   | 222 | 236 |         | Isobe et al (2013) DNA Res 20: 79-92 |
| FVES1442    | Fvb3                                    | 22,352,173       | 304    | 312                   | 314 |     |         | Isobe et al (2013) DNA Res 20: 79-92 |
| FVES1459    | Fvb6                                    | 20,444,015       | 197    | 199                   | 200 |     |         | Isobe et al (2013) DNA Res 20: 79-92 |
| FVES1465    | Fvb4                                    | 23,438,752       | 113    |                       |     |     |         | Isobe et al (2013) DNA Res 20: 79-92 |
| FVES1466    | Fvb4                                    | 22,657,001       | 218    | 224                   |     |     |         | Isobe et al (2013) DNA Res 20: 79-92 |
| FVES1470    | Fvb5                                    | 5,108,525        | TopHit | 298                   | 301 |     |         | Isobe et al (2013) DNA Res 20: 79-92 |
| FVES1472    | Fvb2                                    | 18,384,560       | 319    | 321                   |     |     |         | Isobe et al (2013) DNA Res 20: 79-92 |
| FVES1477    | Fvb7                                    | 21,595,931       | 219    | 272                   |     |     |         | Isobe et al (2013) DNA Res 20: 79-92 |
| FVES1478    | Fvb3                                    | 5,406,377        | 301    | 310                   |     |     |         | Isobe et al (2013) DNA Res 20: 79-92 |
| FVES1487    | Fvb4                                    | 4,472,954        | 378    | 384                   |     |     |         | Isobe et al (2013) DNA Res 20: 79-92 |
| FVES1512    | Fvb3                                    | 28,982,478       | 295    | 303                   | 306 |     |         | Isobe et al (2013) DNA Res 20: 79-92 |
| FVES1517    | Fvb6                                    | 33,041,207       | 276    | 286                   |     |     |         | Isobe et al (2013) DNA Res 20: 79-92 |
| FVES1523    | Fvb5                                    | 9,804,010        | 235    | 252                   | 255 | 264 |         | Isobe et al (2013) DNA Res 20: 79-92 |
| FVES1524    | Fvb1                                    | 21,826,928       | 278    | 281                   |     |     |         | Isobe et al (2013) DNA Res 20: 79-92 |
| FVES1532    | Fvb3                                    | 5,077,598        | 288    |                       |     |     |         | Isobe et al (2013) DNA Res 20: 79-92 |
| FVES1534    | Fvb4                                    | 15,435,396       | 172    | 175                   |     |     |         | Isobe et al (2013) DNA Res 20: 79-92 |
| FVES1535    | Fvb4                                    | 20,858,911       | 249    | 257                   | 278 |     |         | Isobe et al (2013) DNA Res 20: 79-92 |
| FVES1539    | Fvb7                                    | 8,552,967        | 110    | 113                   | 116 |     |         | Isobe et al (2013) DNA Res 20: 79-92 |
| FVES1560    | Fvb7                                    | 17,135,054       | 160    | 163                   | 172 |     |         | Isobe et al (2013) DNA Res 20: 79-92 |
| FVES1568    | Fvb7                                    | 16,307,588       | 239    | 242                   |     |     |         | Isobe et al (2013) DNA Res 20: 79-92 |
| FVES1571    | Fvb3                                    | 1,175,682        | 163    | 175                   |     |     |         | Isobe et al (2013) DNA Res 20: 79-92 |
| FVES1576    | Fvb2                                    | 10,285,469       | 125    |                       |     |     |         | Isobe et al (2013) DNA Res 20: 79-92 |
| FVES1581    | Fvb2                                    | 23,919,178       | 333    | 336                   |     |     |         | Isobe et al (2013) DNA Res 20: 79-92 |
| FVES1582    | Fvb2                                    | 25,546,913       | 231    | 233                   | 252 |     |         | Isobe et al (2013) DNA Res 20: 79-92 |
| FVES1584    | Fvb3                                    | 3,021,362        | 460    | 489                   |     |     |         | Isobe et al (2013) DNA Res 20: 79-92 |
| FVES1595    | Fvb5                                    | 18,441,123       | 90     | 328                   | 332 |     |         | Isobe et al (2013) DNA Res 20: 79-92 |
| FVES1598    | Fvb7                                    | 8,158,421        | 245    | 246                   | 253 |     |         | Isobe et al (2013) DNA Res 20: 79-92 |
| FVES1614    | Fvb2                                    | 24,828,325       | 254    | 275                   |     |     |         | Isobe et al (2013) DNA Res 20: 79-92 |

(continued)

| Marker Name | chromosome<br>( <i>F. vesca</i> v2.0a1) | position<br>(bp) | TopHit | PCR product size (bp) |     |     |     |     |     | Reference                            |
|-------------|-----------------------------------------|------------------|--------|-----------------------|-----|-----|-----|-----|-----|--------------------------------------|
| FVES1621    | Fvb1                                    | 5,938,104        | 214    | 220                   |     |     |     |     |     | Isobe et al (2013) DNA Res 20: 79-92 |
| FVES1627    | Fvb5                                    | 11,219,129       | 281    | 299                   | 302 |     |     |     |     | Isobe et al (2013) DNA Res 20: 79-92 |
| FVES1631    | Fvb2                                    | 23,893,417       | 229    | 241                   | 252 |     |     |     |     | Isobe et al (2013) DNA Res 20: 79-92 |
| FVES1642    | Fvb1                                    | 6,738,614        | 314    | 317                   |     |     |     |     |     | Isobe et al (2013) DNA Res 20: 79-92 |
| FVES1644    | Fvb1                                    | 13,715,692       | 144    | 148                   | 151 | 154 |     |     |     | Isobe et al (2013) DNA Res 20: 79-92 |
| FVES1649    | Fvb1                                    | 16,891,863       | 285    | 356                   |     |     |     |     |     | Isobe et al (2013) DNA Res 20: 79-92 |
| FVES1657    | Fvb3                                    | 10,310,742       | TopHit | 290                   | 291 | 298 | 300 |     |     | Isobe et al (2013) DNA Res 20: 79-92 |
| FVES1669    | Fvb5                                    | 4,694,011        | 258    | 261                   |     |     |     |     |     | Isobe et al (2013) DNA Res 20: 79-92 |
| FVES1687    | Fvb2                                    | 14,573,526       | 172    | 182                   | 184 | 190 | 192 | 196 | 198 | Isobe et al (2013) DNA Res 20: 79-92 |
| FVES1691    | Fvb4                                    | 25,576,525       | 285    | 287                   |     |     |     |     |     | Isobe et al (2013) DNA Res 20: 79-92 |
| FVES1692    | Fvb1                                    | 2,737,155        | TopHit | 279                   | 300 | 324 | 327 | 351 |     | Isobe et al (2013) DNA Res 20: 79-92 |
| FVES1695    | Fvb3                                    | 4,374,257        | 152    |                       |     |     |     |     |     | Isobe et al (2013) DNA Res 20: 79-92 |
| FVES1698    | Fvb4                                    | 13,308,345       | 278    | 310                   |     |     |     |     |     | Isobe et al (2013) DNA Res 20: 79-92 |
| FVES1710    | Fvb1                                    | 6,015,635        | 215    |                       |     |     |     |     |     | Isobe et al (2013) DNA Res 20: 79-92 |
| FVES1711    | Fvb3                                    | 2,704,129        | 249    | 261                   |     |     |     |     |     | Isobe et al (2013) DNA Res 20: 79-92 |
| FVES1721    | Fvb3                                    | 353,999          | 298    |                       |     |     |     |     |     | Isobe et al (2013) DNA Res 20: 79-92 |
| FVES1724    | Fvb6                                    | 34,321,498       | 445    |                       |     |     |     |     |     | Isobe et al (2013) DNA Res 20: 79-92 |
| FVES1738    | Fvb1                                    | 423,798          | 132    | 149                   | 167 |     |     |     |     | Isobe et al (2013) DNA Res 20: 79-92 |
| FVES1739    | Fvb6                                    | 32,464,931       | 288    | 291                   |     |     |     |     |     | Isobe et al (2013) DNA Res 20: 79-92 |
| FVES1746    | Fvb4                                    | 30,935,627       | 210    | 217                   | 221 | 222 |     |     |     | Isobe et al (2013) DNA Res 20: 79-92 |
| FVES1749    | Fvb1                                    | 14,805,390       | 255    | 258                   | 261 | 266 |     |     |     | Isobe et al (2013) DNA Res 20: 79-92 |
| FVES1775    | Fvb2                                    | 26,062,202       | 242    | 248                   |     |     |     |     |     | Isobe et al (2013) DNA Res 20: 79-92 |
| FVES1793    | Fvb3                                    | 764,610          | 178    | 189                   | 193 |     |     |     |     | Isobe et al (2013) DNA Res 20: 79-92 |
| FVES1802    | Fvb5                                    | 2,527,329        | 207    | 209                   |     |     |     |     |     | Isobe et al (2013) DNA Res 20: 79-92 |
| FVES1812    | Fvb4                                    | 15,349,967       | 267    | 280                   | 282 |     |     |     |     | Isobe et al (2013) DNA Res 20: 79-92 |
| FVES1816    | Fvb5                                    | 20,772,009       | 294    | 300                   |     |     |     |     |     | Isobe et al (2013) DNA Res 20: 79-92 |
| FVES1825    | Fvb4                                    | 25,555,833       | 276    | 279                   |     |     |     |     |     | Isobe et al (2013) DNA Res 20: 79-92 |
| FVES1827    | Fvb7                                    | 9,749,962        | 317    | 322                   |     |     |     |     |     | Isobe et al (2013) DNA Res 20: 79-92 |
| FVES1828    | Fvb7                                    | 22,321,284       | TopHit | 265                   | 275 | 287 |     |     |     | Isobe et al (2013) DNA Res 20: 79-92 |
| FVES1834    | Fvb7                                    | 23,491,202       | 217    | 224                   | 229 |     |     |     |     | Isobe et al (2013) DNA Res 20: 79-92 |
| FVES1848    | Fvb6                                    | 37,771,969       | 302    | 305                   |     |     |     |     |     | Isobe et al (2013) DNA Res 20: 79-92 |
| FVES1852    | Fvb4                                    | 16,305,342       | 305    | 307                   |     |     |     |     |     | Isobe et al (2013) DNA Res 20: 79-92 |
| FVES1854    | Fvb2                                    | 19,005,990       | 325    | 329                   |     |     |     |     |     | Isobe et al (2013) DNA Res 20: 79-92 |
| FVES1867    | Fvb2                                    | 23,874,169       | 299    | 311                   |     |     |     |     |     | Isobe et al (2013) DNA Res 20: 79-92 |
| FVES1868    | Fvb3                                    | 31,991,549       | 264    | 267                   | 270 |     |     |     |     | Isobe et al (2013) DNA Res 20: 79-92 |
| FVES1877    | Fvb1                                    | 4,092,938        | 317    | 321                   |     |     |     |     |     | Isobe et al (2013) DNA Res 20: 79-92 |
| FVES1889    | Fvb7                                    | 5,275,207        | 190    | 192                   |     |     |     |     |     | Isobe et al (2013) DNA Res 20: 79-92 |
| FVES1891    | Fvb2                                    | 21,585,091       | 293    | 301                   | 303 |     |     |     |     | Isobe et al (2013) DNA Res 20: 79-92 |
| FVES1895    | Fvb5                                    | 16,188,801       | 214    | 264                   |     |     |     |     |     | Isobe et al (2013) DNA Res 20: 79-92 |
| FVES1897    | Fvb5                                    | 7,297,418        | 124    | 177                   | 179 |     |     |     |     | Isobe et al (2013) DNA Res 20: 79-92 |
| FVES1905    | Fvb2                                    | 23,423,853       | 403    | 412                   |     |     |     |     |     | Isobe et al (2013) DNA Res 20: 79-92 |
| FVES1907    | Fvb1                                    | 7,014,881        | 183    | 185                   | 197 | 201 | 203 |     |     | Isobe et al (2013) DNA Res 20: 79-92 |
| FVES1909    | Fvb1                                    | 7,513,616        | 208    | 215                   |     |     |     |     |     | Isobe et al (2013) DNA Res 20: 79-92 |
| FVES1913    | Fvb4                                    | 29,597,010       | 262    | 264                   |     |     |     |     |     | Isobe et al (2013) DNA Res 20: 79-92 |
| FVES1917    | Fvb2                                    | 8,159,824        | TopHit | 124                   |     |     |     |     |     | Isobe et al (2013) DNA Res 20: 79-92 |
| FVES1928    | Fvb6                                    | 13,535,239       | 148    | 152                   |     |     |     |     |     | Isobe et al (2013) DNA Res 20: 79-92 |
| FVES1936    | Fvb6                                    | 4,148,868        | 256    | 260                   |     |     |     |     |     | Isobe et al (2013) DNA Res 20: 79-92 |
| FVES1941    | Fvb7                                    | 18,963,077       | 271    |                       |     |     |     |     |     | Isobe et al (2013) DNA Res 20: 79-92 |
| FVES1952    | Fvb5                                    | 11,675,124       | 92     | 97                    | 107 |     |     |     |     | Isobe et al (2013) DNA Res 20: 79-92 |
| FVES1962    | Fvb5                                    | 5,638,535        | 230    | 233                   |     |     |     |     |     | Isobe et al (2013) DNA Res 20: 79-92 |
| FVES1971    | Fvb7                                    | 12,477,762       | TopHit | 124                   | 178 | 182 |     |     |     | Isobe et al (2013) DNA Res 20: 79-92 |
| FVES1972    | Fvb1                                    | 619,395          | 170    | 182                   |     |     |     |     |     | Isobe et al (2013) DNA Res 20: 79-92 |
| FVES1981    | Fvb3                                    | 2,291,240        | 249    | 266                   |     |     |     |     |     | Isobe et al (2013) DNA Res 20: 79-92 |
| FVES2001    | Fvb6                                    | 38,622,530       | TopHit | 316                   | 319 |     |     |     |     | Isobe et al (2013) DNA Res 20: 79-92 |
| FVES2003    | Fvb6                                    | 12,312,927       | 244    | 247                   | 249 |     |     |     |     | Isobe et al (2013) DNA Res 20: 79-92 |
| FVES2010    | Fvb3                                    | 17,484,722       | 288    | 294                   | 307 |     |     |     |     | Isobe et al (2013) DNA Res 20: 79-92 |
| FVES2017    | Fvb5                                    | 12,645,386       | 264    |                       |     |     |     |     |     | Isobe et al (2013) DNA Res 20: 79-92 |
| FVES2018    | Fvb6                                    | 23,413,670       | 173    | 181                   | 187 |     |     |     |     | Isobe et al (2013) DNA Res 20: 79-92 |
| FVES2068    | Fvb1                                    | 4,481,745        | 233    | 243                   |     |     |     |     |     | Isobe et al (2013) DNA Res 20: 79-92 |
| FVES2070    | Fvb6                                    | 19,848,016       | 314    | 316                   |     |     |     |     |     | Isobe et al (2013) DNA Res 20: 79-92 |

(continued)

| Marker Name | chromosome<br>( <i>F. vesca</i> v2.0a1) | position<br>(bp) | TopHit | PCR product size (bp) |     |     |     |     | Reference                            |     |                                      |
|-------------|-----------------------------------------|------------------|--------|-----------------------|-----|-----|-----|-----|--------------------------------------|-----|--------------------------------------|
| FVES2099    | FvbUn                                   | 1,063,635        |        | 245                   | 361 | 364 | 368 |     | Isobe et al (2013) DNA Res 20: 79-92 |     |                                      |
| FVES2105    | Fvb6                                    | 5,880,711        |        | 249                   | 253 | 254 |     |     | Isobe et al (2013) DNA Res 20: 79-92 |     |                                      |
| FVES2110    | Fvb2                                    | 8,987,243        | TopHit | 232                   | 237 |     |     |     | Isobe et al (2013) DNA Res 20: 79-92 |     |                                      |
| FVES2115    | Fvb7                                    | 5,262,108        |        | 207                   | 210 |     |     |     | Isobe et al (2013) DNA Res 20: 79-92 |     |                                      |
| FVES2124    | Fvb6                                    | 32,980,898       |        | 393                   | 400 | 401 |     |     | Isobe et al (2013) DNA Res 20: 79-92 |     |                                      |
| FVES2136    | Fvb7                                    | 13,277,076       |        | 171                   | 173 |     |     |     | Isobe et al (2013) DNA Res 20: 79-92 |     |                                      |
| FVES2143    | Fvb4                                    | 25,952,308       |        | 133                   | 154 |     |     |     | Isobe et al (2013) DNA Res 20: 79-92 |     |                                      |
| FVES2156    | Fvb3                                    | 27,290,475       |        | 157                   | 159 | 160 |     |     | Isobe et al (2013) DNA Res 20: 79-92 |     |                                      |
| FVES2164    | Fvb6                                    | 32,182,811       |        | 222                   | 223 |     |     |     | Isobe et al (2013) DNA Res 20: 79-92 |     |                                      |
| FVES2166    | Fvb5                                    | 28,562,201       |        | 179                   | 198 |     |     |     | Isobe et al (2013) DNA Res 20: 79-92 |     |                                      |
| FVES2170    | Fvb2                                    | 15,148,329       |        | 229                   | 234 |     |     |     | Isobe et al (2013) DNA Res 20: 79-92 |     |                                      |
| FVES2178    | Fvb6                                    | 26,913,208       |        | 306                   | 315 |     |     |     | Isobe et al (2013) DNA Res 20: 79-92 |     |                                      |
| FVES2182    | FvbUn                                   | 1,831,424        |        | 214                   | 216 | 223 | 225 | 227 | Isobe et al (2013) DNA Res 20: 79-92 |     |                                      |
| FVES2185    | Fvb5                                    | 18,243,684       |        | 242                   | 246 |     |     |     | Isobe et al (2013) DNA Res 20: 79-92 |     |                                      |
| FVES2186    | Fvb4                                    | 31,218,467       |        | 256                   | 270 |     |     |     | Isobe et al (2013) DNA Res 20: 79-92 |     |                                      |
| FVES2193    | Fvb1                                    | 10,416,590       |        | 300                   | 306 | 312 |     |     | Isobe et al (2013) DNA Res 20: 79-92 |     |                                      |
| FVES2200    | Fvb2                                    | 18,333,909       |        | 124                   | 131 | 139 |     |     | Isobe et al (2013) DNA Res 20: 79-92 |     |                                      |
| FVES2229    | Fvb4                                    | 31,209,760       |        | 210                   | 212 |     |     |     | Isobe et al (2013) DNA Res 20: 79-92 |     |                                      |
| FVES2232    | Fvb2                                    | 16,373,598       |        | 260                   | 266 |     |     |     | Isobe et al (2013) DNA Res 20: 79-92 |     |                                      |
| FVES2235    | Fvb4                                    | 29,895,233       | TopHit | 320                   | 322 |     |     |     | Isobe et al (2013) DNA Res 20: 79-92 |     |                                      |
| FVES2244    | Fvb7                                    | 19,146,860       |        | 299                   | 301 | 304 |     |     | Isobe et al (2013) DNA Res 20: 79-92 |     |                                      |
| FVES2267    | Fvb6                                    | 7,393,848        |        | 224                   | 227 | 246 |     |     | Isobe et al (2013) DNA Res 20: 79-92 |     |                                      |
| FVES2293    | Fvb5                                    | 23,572,392       |        | 257                   | 260 |     |     |     | Isobe et al (2013) DNA Res 20: 79-92 |     |                                      |
| FVES2301    | Fvb5                                    | 5,250,905        |        | 142                   | 145 | 153 |     |     | Isobe et al (2013) DNA Res 20: 79-92 |     |                                      |
| FVES2303    | Fvb3                                    | 27,170,368       |        | 322                   | 330 |     |     |     | Isobe et al (2013) DNA Res 20: 79-92 |     |                                      |
| FVES2306    | Fvb7                                    | 16,764,840       |        | 375                   | 380 |     |     |     | Isobe et al (2013) DNA Res 20: 79-92 |     |                                      |
| FVES2349    | Fvb5                                    | 28,903,163       |        | 294                   | 307 |     |     |     | Isobe et al (2013) DNA Res 20: 79-92 |     |                                      |
| FVES2369    | Fvb6                                    | 12,584,411       |        | 274                   | 277 |     |     |     | Isobe et al (2013) DNA Res 20: 79-92 |     |                                      |
| FVES2372    | Fvb7                                    | 1,788,839        |        | 194                   | 200 |     |     |     | Isobe et al (2013) DNA Res 20: 79-92 |     |                                      |
| FVES2375    | Fvb2                                    | 1,844,589        | TopHit | 374                   | 383 | 401 | 404 |     | Isobe et al (2013) DNA Res 20: 79-92 |     |                                      |
| FVES2397    | Fvb3                                    | 2,706,427        |        | 390                   | 396 |     |     |     | Isobe et al (2013) DNA Res 20: 79-92 |     |                                      |
| FVES2410    | Fvb3                                    | 27,249,383       |        | 307                   | 314 |     |     |     | Isobe et al (2013) DNA Res 20: 79-92 |     |                                      |
| FVES2418    | Fvb6                                    | 1,950,480        |        | 198                   |     |     |     |     | Isobe et al (2013) DNA Res 20: 79-92 |     |                                      |
| FVES2425    | Fvb4                                    | 14,854,082       |        | 266                   | 272 | 278 |     |     | Isobe et al (2013) DNA Res 20: 79-92 |     |                                      |
| FVES2431    | Fvb4                                    | 30,658,177       |        | 337                   | 434 |     |     |     | Isobe et al (2013) DNA Res 20: 79-92 |     |                                      |
| FVES2441    | Fvb4                                    | 31,330,746       |        | 322                   | 324 | 327 |     |     | Isobe et al (2013) DNA Res 20: 79-92 |     |                                      |
| FVES2443    | Fvb4                                    | 24,158,889       |        | 187                   | 286 | 307 |     |     | Isobe et al (2013) DNA Res 20: 79-92 |     |                                      |
| FVES2445    | Fvb6                                    | 35,316,575       |        | 276                   | 279 | 281 |     |     | Isobe et al (2013) DNA Res 20: 79-92 |     |                                      |
| FVES2449    | Fvb6                                    | 11,048,313       |        | 236                   | 245 |     |     |     | Isobe et al (2013) DNA Res 20: 79-92 |     |                                      |
| FVES2481    | Fvb7                                    | 6,500,676        |        | 255                   | 260 | 264 |     |     | Isobe et al (2013) DNA Res 20: 79-92 |     |                                      |
| FVES2492    | Fvb6                                    | 28,593,458       |        | 507                   | 520 | 522 | 547 |     | Isobe et al (2013) DNA Res 20: 79-92 |     |                                      |
| FVES2504    | Fvb3                                    | 556,496          | TopHit | 315                   | 334 |     |     |     | Isobe et al (2013) DNA Res 20: 79-92 |     |                                      |
| FVES2505    | Fvb6                                    | 20,636,220       |        | 470                   | 477 | 490 |     |     | Isobe et al (2013) DNA Res 20: 79-92 |     |                                      |
| FVES2507    | Fvb6                                    | 2,237,904        |        | 161                   | 190 | 211 | 248 |     | Isobe et al (2013) DNA Res 20: 79-92 |     |                                      |
| FVES2531    | Fvb7                                    | 14,976,084       |        | 347                   | 348 |     |     |     | Isobe et al (2013) DNA Res 20: 79-92 |     |                                      |
| FVES2533    | Fvb6                                    | 25,337,378       |        | 230                   | 235 | 261 |     |     | Isobe et al (2013) DNA Res 20: 79-92 |     |                                      |
| FVES2539    | Fvb5                                    | 12,804,298       |        | 222                   | 225 |     |     |     | Isobe et al (2013) DNA Res 20: 79-92 |     |                                      |
| FVES2543    | Fvb2                                    | 8,074,235        |        | 373                   | 390 |     |     |     | Isobe et al (2013) DNA Res 20: 79-92 |     |                                      |
| FVES2554    | Fvb1                                    | 10,406,292       |        | 189                   | 192 |     |     |     | Isobe et al (2013) DNA Res 20: 79-92 |     |                                      |
| FVES2555    | Fvb6                                    | 1,100,621        |        | 103                   | 115 |     |     |     | Isobe et al (2013) DNA Res 20: 79-92 |     |                                      |
| FVES2579    | Fvb3                                    | 2,688,307        |        | 262                   | 267 |     |     |     | Isobe et al (2013) DNA Res 20: 79-92 |     |                                      |
| FVES2587    | Fvb1                                    | 2,313,796        |        | 121                   | 124 |     |     |     | Isobe et al (2013) DNA Res 20: 79-92 |     |                                      |
| FVES2592    | Fvb3                                    | 27,170,368       |        | 397                   | 404 |     |     |     | Isobe et al (2013) DNA Res 20: 79-92 |     |                                      |
| FVES2597    | Fvb1                                    | 21,099,446       |        | 161                   | 167 |     |     |     | Isobe et al (2013) DNA Res 20: 79-92 |     |                                      |
| FVES2614    | Fvb5                                    | 86,108           |        | 263                   | 266 |     |     |     | Isobe et al (2013) DNA Res 20: 79-92 |     |                                      |
| FVES2615    | Fvb5                                    | 26,003,373       |        | 177                   | 180 |     |     |     | Isobe et al (2013) DNA Res 20: 79-92 |     |                                      |
| FVES2627    | Fvb5                                    | 16,043,309       |        | 269                   | 270 | 272 |     |     | Isobe et al (2013) DNA Res 20: 79-92 |     |                                      |
| FVES2634    | Fvb2                                    | 20,151,933       |        | 267                   | 270 |     |     |     | Isobe et al (2013) DNA Res 20: 79-92 |     |                                      |
| FVES2638    | Fvb6                                    | 9,032,234        |        | 242                   | 245 |     |     |     | Isobe et al (2013) DNA Res 20: 79-92 |     |                                      |
| FVES2646    | Fvb1                                    | 18,021,820       |        | 172                   | 178 | 180 | 264 | 267 | 270                                  | 273 | Isobe et al (2013) DNA Res 20: 79-92 |

(continued)

| Marker Name | chromosome<br>( <i>F. vesca</i> v2.0a1) | position<br>(bp) | TopHit | PCR product size (bp) |     |     |     | Reference                            |
|-------------|-----------------------------------------|------------------|--------|-----------------------|-----|-----|-----|--------------------------------------|
| FVES2674    | Fvb3                                    | 2,557,436        | 180    | 192                   |     |     |     | Isobe et al (2013) DNA Res 20: 79-92 |
| FVES2689    | Fvb6                                    | 36,379,330       | 270    | 279                   |     |     |     | Isobe et al (2013) DNA Res 20: 79-92 |
| FVES2696    | Fvb1                                    | 2,646,459        | 271    | 280                   |     |     |     | Isobe et al (2013) DNA Res 20: 79-92 |
| FVES2707    | Fvb4                                    | 25,421,639       | 205    | 220                   |     |     |     | Isobe et al (2013) DNA Res 20: 79-92 |
| FVES2713    | Fvb5                                    | 8,093,250        | 216    |                       |     |     |     | Isobe et al (2013) DNA Res 20: 79-92 |
| FVES2715    | Fvb6                                    | 35,157,628       | 289    | 295                   |     |     |     | Isobe et al (2013) DNA Res 20: 79-92 |
| FVES2720    | Fvb6                                    | 36,933,081       | 512    | 518                   | 520 | 529 |     | Isobe et al (2013) DNA Res 20: 79-92 |
| FVES2736    | Fvb6                                    | 34,919,197       | 277    | 281                   |     |     |     | Isobe et al (2013) DNA Res 20: 79-92 |
| FVES2756    | Fvb2                                    | 19,598,797       | 290    | 292                   |     |     |     | Isobe et al (2013) DNA Res 20: 79-92 |
| FVES2765    | Fvb7                                    | 6,035,101        | 146    | 149                   | 150 | 156 |     | Isobe et al (2013) DNA Res 20: 79-92 |
| FVES2777    | Fvb1                                    | 6,574,119        | 267    | 275                   |     |     |     | Isobe et al (2013) DNA Res 20: 79-92 |
| FVES2780    | Fvb7                                    | 18,014,725       | 259    | 262                   |     |     |     | Isobe et al (2013) DNA Res 20: 79-92 |
| FVES2836    | Fvb3                                    | 23,882,635       | 372    |                       |     |     |     | Isobe et al (2013) DNA Res 20: 79-92 |
| FVES2866    | Fvb2                                    | 27,445,710       | 296    | 298                   |     |     |     | Isobe et al (2013) DNA Res 20: 79-92 |
| FVES2874    | Fvb2                                    | 26,932,606       | 460    | 471                   | 475 |     |     | Isobe et al (2013) DNA Res 20: 79-92 |
| FVES2881    | Fvb7                                    | 23,038,548       | 209    | 228                   |     |     |     | Isobe et al (2013) DNA Res 20: 79-92 |
| FVES2882    | Fvb4                                    | 14,411,361       | 264    | 266                   | 266 |     |     | Isobe et al (2013) DNA Res 20: 79-92 |
| FVES2889    | Fvb7                                    | 17,734,927       | 297    | 321                   | 324 |     |     | Isobe et al (2013) DNA Res 20: 79-92 |
| FVES2901    | Fvb5                                    | 19,192,042       | 163    | 166                   |     |     |     | Isobe et al (2013) DNA Res 20: 79-92 |
| FVES2914    | Fvb3                                    | 230,329          | TopHit | 340                   | 345 | 352 |     | Isobe et al (2013) DNA Res 20: 79-92 |
| FVES2915    | Fvb6                                    | 5,755,290        | 257    | 260                   |     |     |     | Isobe et al (2013) DNA Res 20: 79-92 |
| FVES2939    | Fvb7                                    | 5,810,290        | 286    |                       |     |     |     | Isobe et al (2013) DNA Res 20: 79-92 |
| FVES2946    | Fvb3                                    | 13,868,451       | 289    | 385                   | 393 |     |     | Isobe et al (2013) DNA Res 20: 79-92 |
| FVES2947    | FvbUn                                   | 1,760,141        | 312    | 317                   | 321 | 324 |     | Isobe et al (2013) DNA Res 20: 79-92 |
| FVES2950    | Fvb1                                    | 17,037,047       | 235    | 240                   |     |     |     | Isobe et al (2013) DNA Res 20: 79-92 |
| FVES2954    | Fvb1                                    | 10,125,913       | 183    | 213                   |     |     |     | Isobe et al (2013) DNA Res 20: 79-92 |
| FVES2957    | Fvb6                                    | 33,872,520       | 156    | 166                   | 168 |     |     | Isobe et al (2013) DNA Res 20: 79-92 |
| FVES2963    | Fvb7                                    | 17,687,874       | 203    | 205                   | 209 |     |     | Isobe et al (2013) DNA Res 20: 79-92 |
| FVES2970    | Fvb6                                    | 21,833,297       | 126    | 153                   | 162 |     |     | Isobe et al (2013) DNA Res 20: 79-92 |
| FVES2971    | Fvb2                                    | 279,734          | 164    | 168                   |     |     |     | Isobe et al (2013) DNA Res 20: 79-92 |
| FVES2973    | Fvb6                                    | 38,046,909       | TopHit | 292                   | 310 | 322 |     | Isobe et al (2013) DNA Res 20: 79-92 |
| FVES3000    | Fvb2                                    | 10,382,930       | 213    | 225                   |     |     |     | Isobe et al (2013) DNA Res 20: 79-92 |
| FVES3002    | Fvb3                                    | 19,111,117       | 324    | 333                   | 337 |     |     | Isobe et al (2013) DNA Res 20: 79-92 |
| FVES3011    | Fvb1                                    | 1,997,119        | 338    | 343                   |     |     |     | Isobe et al (2013) DNA Res 20: 79-92 |
| FVES3014    | Fvb5                                    | 9,584,819        | 117    | 120                   |     |     |     | Isobe et al (2013) DNA Res 20: 79-92 |
| FVES3024    | Fvb4                                    | 32,259,912       | TopHit | 264                   | 272 |     |     | Isobe et al (2013) DNA Res 20: 79-92 |
| FVES3026    | Fvb7                                    | 7,889,389        | 174    | 177                   |     |     |     | Isobe et al (2013) DNA Res 20: 79-92 |
| FVES3027    | Fvb1                                    | 18,289,138       | 391    | 399                   | 411 |     |     | Isobe et al (2013) DNA Res 20: 79-92 |
| FVES3051    | Fvb6                                    | 21,321,398       | 440    | 443                   |     |     |     | Isobe et al (2013) DNA Res 20: 79-92 |
| FVES3054    | Fvb2                                    | 22,778,479       | 374    | 377                   |     |     |     | Isobe et al (2013) DNA Res 20: 79-92 |
| FVES3069    | Fvb6                                    | 35,929,373       | 363    |                       |     |     |     | Isobe et al (2013) DNA Res 20: 79-92 |
| FVES3070    | Fvb7                                    | 22,275,364       | 339    | 342                   |     |     |     | Isobe et al (2013) DNA Res 20: 79-92 |
| FVES3083    | Fvb1                                    | 3,205,869        | 304    | 316                   |     |     |     | Isobe et al (2013) DNA Res 20: 79-92 |
| FVES3100    | Fvb1                                    | 3,105,465        | 221    | 224                   |     |     |     | Isobe et al (2013) DNA Res 20: 79-92 |
| FVES3101    | Fvb6                                    | 20,090,195       | 249    | 252                   | 255 | 261 | 272 | Isobe et al (2013) DNA Res 20: 79-92 |
| FVES3112    | Fvb7                                    | 4,667,722        | 150    | 155                   |     |     |     | Isobe et al (2013) DNA Res 20: 79-92 |
| FVES3123    | Fvb3                                    | 26,901,937       | 308    | 311                   | 313 |     |     | Isobe et al (2013) DNA Res 20: 79-92 |
| FVES3135    | Fvb5                                    | 17,674,763       | 226    | 237                   |     |     |     | Isobe et al (2013) DNA Res 20: 79-92 |
| FVES3136    | Fvb5                                    | 2,553,444        | 406    | 412                   |     |     |     | Isobe et al (2013) DNA Res 20: 79-92 |
| FVES3166    | Fvb5                                    | 19,777,123       | 226    | 229                   |     |     |     | Isobe et al (2013) DNA Res 20: 79-92 |
| FVES3177    | Fvb2                                    | 18,029,445       | TopHit | 109                   | 174 | 188 |     | Isobe et al (2013) DNA Res 20: 79-92 |
| FVES3183    | Fvb7                                    | 15,516,085       | 185    | 289                   | 305 |     |     | Isobe et al (2013) DNA Res 20: 79-92 |
| FVES3187    | Fvb5                                    | 9,410,225        | 156    | 168                   |     |     |     | Isobe et al (2013) DNA Res 20: 79-92 |
| FVES3198    | Fvb5                                    | 13,548,685       | 519    | 521                   |     |     |     | Isobe et al (2013) DNA Res 20: 79-92 |
| FVES3227    | Fvb6                                    | 34,270,334       | 374    | 379                   |     |     |     | Isobe et al (2013) DNA Res 20: 79-92 |
| FVES3232    | Fvb7                                    | 13,564,898       | 239    | 242                   |     |     |     | Isobe et al (2013) DNA Res 20: 79-92 |
| FVES3256    | Fvb3                                    | 8,085,238        | 437    | 449                   | 452 |     |     | Isobe et al (2013) DNA Res 20: 79-92 |
| FVES3274    | Fvb5                                    | 3,549,108        | 349    | 352                   | 358 |     |     | Isobe et al (2013) DNA Res 20: 79-92 |
| FVES3275    | Fvb2                                    | 21,817,762       | 206    | 208                   |     |     |     | Isobe et al (2013) DNA Res 20: 79-92 |
| FVES3291    | Fvb2                                    | 16,036,969       | TopHit | 185                   |     |     |     | Isobe et al (2013) DNA Res 20: 79-92 |

(continued)

| Marker Name | chromosome<br>( <i>F. vesca</i> v2.0a1) | position<br>(bp) | TopHit | PCR product size (bp) |     |     |     | Reference                            |
|-------------|-----------------------------------------|------------------|--------|-----------------------|-----|-----|-----|--------------------------------------|
| FVES3325    | Fvb1                                    | 9,369,295        |        | 206                   |     |     |     | Isobe et al (2013) DNA Res 20: 79-92 |
| FVES3330    | Fvb1                                    | 406,630          |        | 186                   | 192 |     |     | Isobe et al (2013) DNA Res 20: 79-92 |
| FVES3342    | Fvb7                                    | 21,806,738       | TopHit | 310                   | 337 |     |     | Isobe et al (2013) DNA Res 20: 79-92 |
| FVES3376    | Fvb6                                    | 22,425,686       |        | 143                   | 145 |     |     | Isobe et al (2013) DNA Res 20: 79-92 |
| FVES3378    | Fvb7                                    | 21,246,268       |        | 259                   | 260 | 262 |     | Isobe et al (2013) DNA Res 20: 79-92 |
| FVES3380    | Fvb2                                    | 19,702,591       |        | 211                   | 213 | 226 | 237 | Isobe et al (2013) DNA Res 20: 79-92 |
| FVES3394    | Fvb2                                    | 5,273,510        |        | 245                   | 251 |     |     | Isobe et al (2013) DNA Res 20: 79-92 |
| FVES3400    | Fvb5                                    | 4,109,012        |        | 378                   | 380 | 397 | 400 | Isobe et al (2013) DNA Res 20: 79-92 |
| FVES3402    | Fvb4                                    | 27,537,052       |        | 289                   | 294 | 299 |     | Isobe et al (2013) DNA Res 20: 79-92 |
| FVES3406    | Fvb6                                    | 8,159,245        |        | 304                   |     |     |     | Isobe et al (2013) DNA Res 20: 79-92 |
| FVES3414    | Fvb3                                    | 13,922,430       |        | 129                   | 132 |     |     | Isobe et al (2013) DNA Res 20: 79-92 |
| FVES3419    | Fvb6                                    | 759,230          |        | 404                   | 411 |     |     | Isobe et al (2013) DNA Res 20: 79-92 |
| FVES3421    | Fvb3                                    | 3,248,605        |        | 289                   | 291 |     |     | Isobe et al (2013) DNA Res 20: 79-92 |
| FVES3422    | Fvb7                                    | 21,649,365       |        | 278                   |     |     |     | Isobe et al (2013) DNA Res 20: 79-92 |
| FVES3423    | Fvb2                                    | 10,953,148       |        | 239                   | 245 | 251 |     | Isobe et al (2013) DNA Res 20: 79-92 |
| FVES3434    | Fvb5                                    | 9,083,213        |        | 207                   | 213 | 216 |     | Isobe et al (2013) DNA Res 20: 79-92 |
| FVES3449    | Fvb6                                    | 30,478,505       |        | 297                   | 302 |     |     | Isobe et al (2013) DNA Res 20: 79-92 |
| FVES3450    | Fvb6                                    | 31,620,010       | TopHit | 302                   | 309 |     |     | Isobe et al (2013) DNA Res 20: 79-92 |
| FVES3464    | Fvb4                                    | 29,424,179       |        | 357                   | 360 |     |     | Isobe et al (2013) DNA Res 20: 79-92 |
| FVES3477    | Fvb4                                    | 15,179,835       |        | 228                   |     |     |     | Isobe et al (2013) DNA Res 20: 79-92 |
| FVES3480    | Fvb5                                    | 4,578,259        |        | 412                   |     |     |     | Isobe et al (2013) DNA Res 20: 79-92 |
| FVES3507    | Fvb3                                    | 7,087,095        |        | 260                   | 284 |     |     | Isobe et al (2013) DNA Res 20: 79-92 |
| FVES3512    | Fvb5                                    | 1,054,381        |        | 220                   | 226 | 229 |     | Isobe et al (2013) DNA Res 20: 79-92 |
| FVES3517    | Fvb3                                    | 26,854,909       |        | 315                   | 318 |     |     | Isobe et al (2013) DNA Res 20: 79-92 |
| FVES3528    | Fvb2                                    | 35,186           |        | 202                   | 208 | 210 |     | Isobe et al (2013) DNA Res 20: 79-92 |
| FVES3535    | Fvb7                                    | 19,266,100       | TopHit | 192                   | 204 |     |     | Isobe et al (2013) DNA Res 20: 79-92 |
| FVES3537    | Fvb5                                    | 7,444,961        |        | 179                   |     |     |     | Isobe et al (2013) DNA Res 20: 79-92 |
| FVES3556    | Fvb6                                    | 23,907,460       |        | 289                   | 308 |     |     | Isobe et al (2013) DNA Res 20: 79-92 |
| FVES3564    | Fvb6                                    | 23,755,325       |        | 242                   |     |     |     | Isobe et al (2013) DNA Res 20: 79-92 |
| FVES3600    | Fvb7                                    | 10,043,743       |        | 263                   | 266 |     |     | Isobe et al (2013) DNA Res 20: 79-92 |
| FVES3615    | Fvb4                                    | 7,890,418        |        | 298                   | 317 |     |     | Isobe et al (2013) DNA Res 20: 79-92 |
| FVES3628    | Fvb2                                    | 13,385,530       |        | 194                   | 203 | 318 |     | Isobe et al (2013) DNA Res 20: 79-92 |
| FVES3634    | Fvb6                                    | 34,949,070       |        | 144                   | 153 |     |     | Isobe et al (2013) DNA Res 20: 79-92 |
| FVES3646    | Fvb2                                    | 24,411,751       |        | 248                   | 250 | 253 |     | Isobe et al (2013) DNA Res 20: 79-92 |
| FVES3662    | Fvb2                                    | 26,190,768       |        | 256                   | 258 |     |     | Isobe et al (2013) DNA Res 20: 79-92 |
| FVES3680    | Fvb4                                    | 59,501           |        | 245                   | 257 |     |     | Isobe et al (2013) DNA Res 20: 79-92 |
| FVES3682    | Fvb7                                    | 8,469,973        | TopHit | 239                   |     |     |     | Isobe et al (2013) DNA Res 20: 79-92 |
| FVES3693    | Fvb5                                    | 12,362,334       |        | 140                   | 141 |     |     | Isobe et al (2013) DNA Res 20: 79-92 |
| FVES3695    | Fvb5                                    | 4,891,567        |        | 234                   | 240 | 264 |     | Isobe et al (2013) DNA Res 20: 79-92 |
| FVES3702    | Fvb2                                    | 25,059,351       |        | 282                   | 288 |     |     | Isobe et al (2013) DNA Res 20: 79-92 |
| FVES3756    | Fvb5                                    | 27,869,858       | TopHit | 231                   | 234 |     |     | Isobe et al (2013) DNA Res 20: 79-92 |
| FVES3758    | Fvb7                                    | 6,876,675        |        | 308                   | 312 | 315 | 319 | Isobe et al (2013) DNA Res 20: 79-92 |
| FVES3766    | Fvb6                                    | 25,212,095       |        | 306                   | 308 |     |     | Isobe et al (2013) DNA Res 20: 79-92 |
| FVES3769    | Fvb3                                    | 2,215,137        |        | 299                   | 312 |     |     | Isobe et al (2013) DNA Res 20: 79-92 |
| FVES3770    | Fvb5                                    | 4,461,300        |        | 277                   | 290 |     |     | Isobe et al (2013) DNA Res 20: 79-92 |
| FVES3774    | Fvb2                                    | 4,519,360        |        | 217                   | 223 | 229 |     | Isobe et al (2013) DNA Res 20: 79-92 |
